# Supplementary material for: Complementary LC-MS/MS-Based N-Glycan, N-Glycopeptide, and Intact N-Glycoprotein Profiling Reveals Unconventional Asn71-Glycosylation of Human Neutrophil Cathepsin G
Source: MDPI journal article supplement (doi:10.3390/biom5031832), 2015-08-12

## Supplementary file for

### Complementary LC-MS/MS based *N*-glycan, *N*-glycopeptide and intact *N*-glycoprotein profiling reveals unconventional Asn71-glycosylation of human neutrophil cathepsin G

Ian Loke, Nicolle H. Packer, Morten Thaysen-Andersen \*

Department of Chemistry and Biomolecular Sciences, Macquarie University, North Ryde, NSW 2109, Australia. \*Author to whom correspondence should be addressed; E-Mail: morten.andersen@mq.edu.au (M.T.-A.); Tel.: +61-2-9850-7487; Fax: +61-2-9850-6192.

**Table S1:** Overview of the glycan numbers, masses and monosaccharide compositions of the *N*-glycans released from the nCG protein preparation.

**Figure S1:** Assessment of nCG purity and autoproteolytic activity with and without PMSF treatment using gel electrophoresis under reducing and denaturing conditions.

**Figure S2:** Separation of sialo-isomers of three types of monoantennary complex *N*-glycans using PGC-LC-CID-MS/MS.

**Figure S3:** Annotated PGC-LC-ESI-CID-MS/MS spectra of all observed *N*-glycans released from the protein preparation of nCG.

**Figure S4:** Annotated RP-LC-ESI-CID/ETD-MS/MS spectra of all *N*-glycopeptides identified from the chymotryptic peptide mixture of the nCG protein preparation.

**Figure S5:** Presence of oxidised and absence of non-oxidised Met152 on a chymotryptic peptide of nCG as evaluated using RP-LC-ESI-ETD-MS/MS.

**Figure S6:** Comparison of high and low fragmentor potential when profiling intact nCG using high resolution QTOF-ESI-MS.

**Figure S7:** *N*-glycosidase F-resistance of truncated chitobiose core Asn71-glycopeptides of nCG.

**Figure S8:** 3D modelling of trimannosyl-chitobiose core monoantennary core fucosylated  $\alpha$ 2,6-monosialylated *N*-glycan on Asn71 of nCG.

**Supplementary Table S1.** Overview of the glycan numbers, masses and monosaccharide compositions of the *N*-glycans released from the nCG protein preparation.

| Glycan # | RT (min) | <i>m/z</i> | Charge (Z) | Obs. Mass (M, Da) | Theo mass (M, Da) | Hex | HexNAc | dHex | NeuAc | Type                                                                                   |
|----------|----------|------------|------------|-------------------|-------------------|-----|--------|------|-------|----------------------------------------------------------------------------------------|
| 1        | 33.9     | 571.3      | 1-         | 572.3             | 572.2             |     | 2      | 1    |       | Core fucosylated chitobiose core (M0F)                                                 |
| 2        | 31.3     | 587.5      | 1-         | 588.5             | 588.2             | 1   | 2      |      |       | Paucimannose (M1)                                                                      |
| 3        | 40.9     | 733.3      | 1-         | 734.3             | 734.3             | 1   | 2      | 1    |       | Core fucosylated paucimannose (M1F)                                                    |
| 4        | 36.1     | 749.3      | 1-         | 750.3             | 750.3             | 2   | 2      |      |       | Paucimannose (M2)                                                                      |
| 5        | 44.7     | 895.3      | 1-         | 896.3             | 896.3             | 2   | 2      | 1    |       | Core fucosylated paucimannose (M2F)                                                    |
| 6        | 51.0     | 1057.4     | 1-         | 1058.4            | 1058.4            | 3   | 2      | 1    |       | Core fucosylated paucimannose (M3F)                                                    |
| 7a       | 45.2     | 775.3      | 2-         | 1552.6            | 1552.5            | 3   | 3      | 1    | 1     | Bimannosyl-chitobiose core monoantennary core fucosylated $\alpha$ 2,6-monosialylated  |
| 7b       | 51.5     | 775.3      | 2-         | 1552.6            | 1552.5            | 3   | 3      | 1    | 1     | Bimannosyl-chitobiose core monoantennary core fucosylated $\alpha$ 2,3-monosialylated  |
| 8        | 42.2     | 783.6      | 2-         | 1569.2            | 1568.5            | 4   | 3      |      | 1     | Trimannosyl-chitobiose core monoantennary $\alpha$ 2,6-monosialylated                  |
| 9a       | 47.5     | 856.4      | 2-         | 1714.8            | 1714.6            | 4   | 3      | 1    | 1     | Trimannosyl-chitobiose core monoantennary core fucosylated $\alpha$ 2,6-monosialylated |
| 9b       | 55.1     | 856.4      | 2-         | 1714.8            | 1714.6            | 4   | 3      | 1    | 1     | Trimannosyl-chitobiose core monoantennary core fucosylated $\alpha$ 2,3-monosialylated |

**Supplementary Figure S1.** Assessment of the nCG purity and autoproteolytic activity with and without PMSF treatment using gel electrophoresis under reducing and denaturing conditions. Gel stained with Coomassie Brilliant Blue. \*Separate gel.

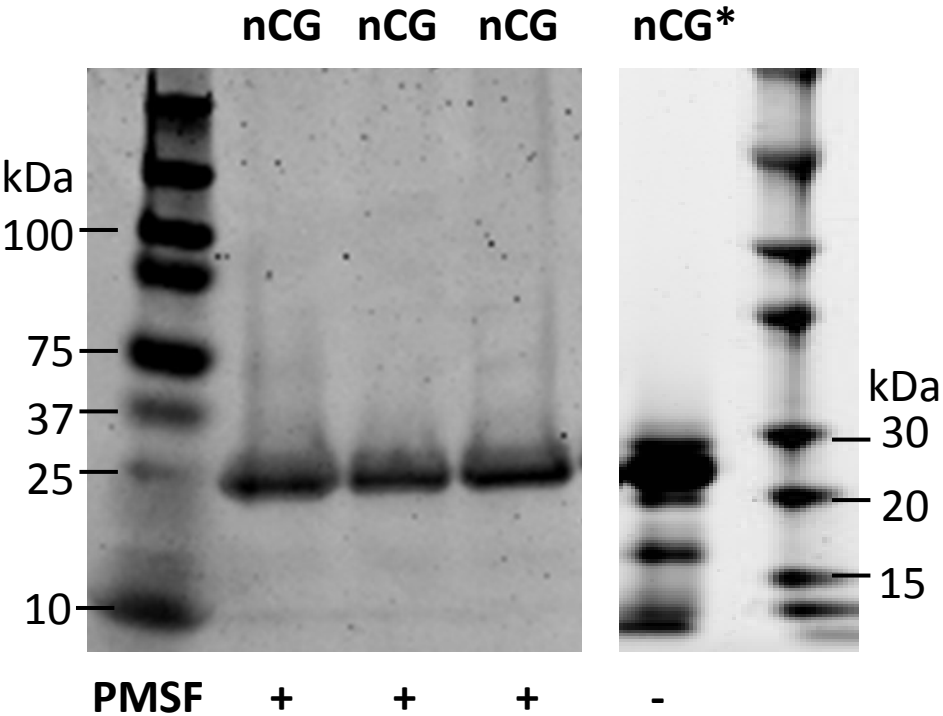

**Supplementary Figure S2.** Separation of sialo-isomers of three types of monoantennary complex *N*-glycans using PGC-LC-CID-MS/MS [23]. Symbols are used according to the Consortium for Functional Glycomics / Essentials of Glycobiology notation.

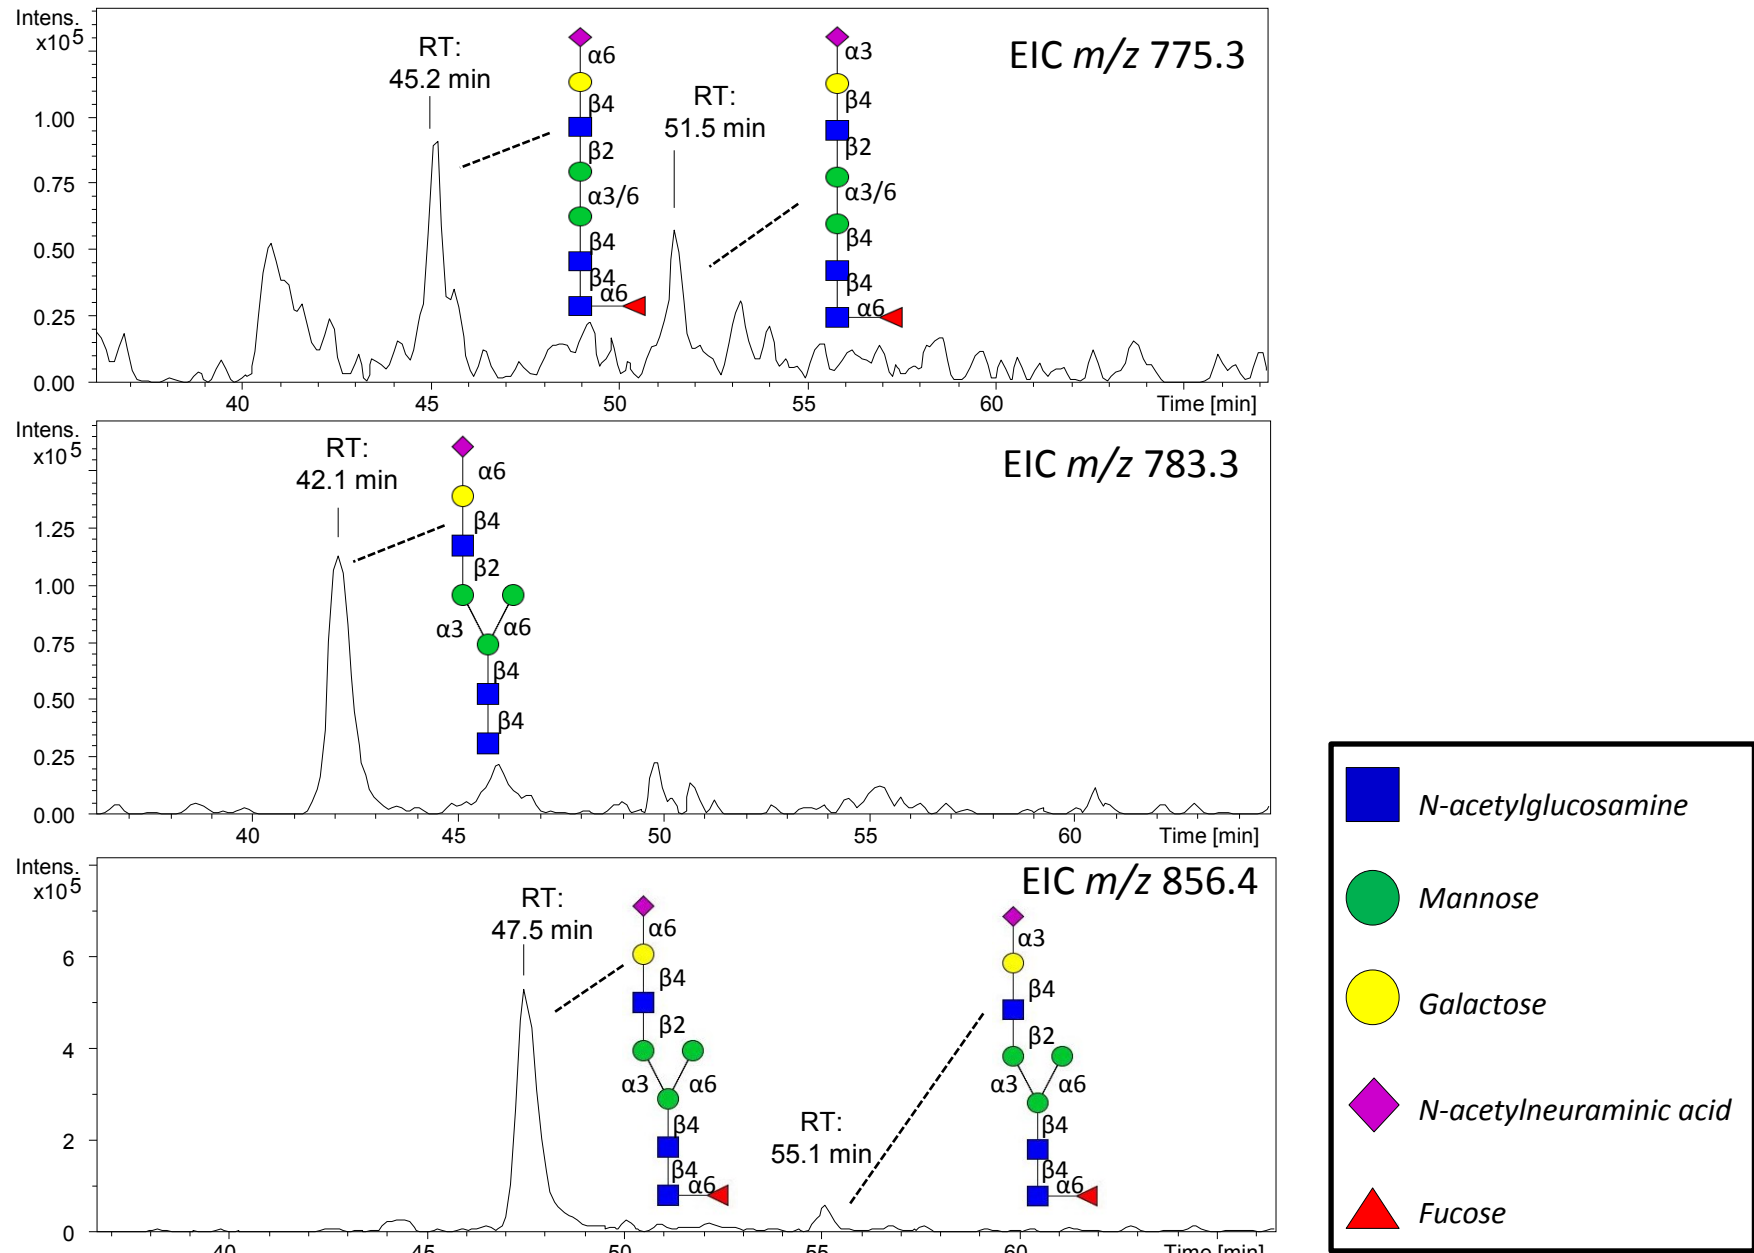

**Supplementary Figure S3.** Annotated PGC-LC-ESI-CID-MS/MS spectra of all observed *N*-glycans released from the protein preparation of nCG. Fragmentation of the glycans were annotated according to the Domon-Costello nomenclature [34]. All released glycans were in their reduced (alditol) prior to analysis.

# Glycan # 1

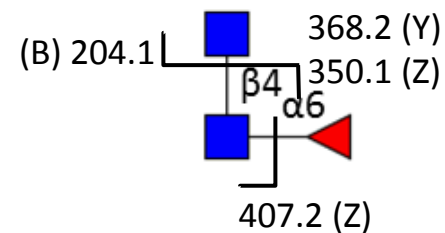

**MOF**

Observed  $m/z$  571.3 (1-), RT: 33.9 min  
[M-H]<sup>-</sup> 571.3

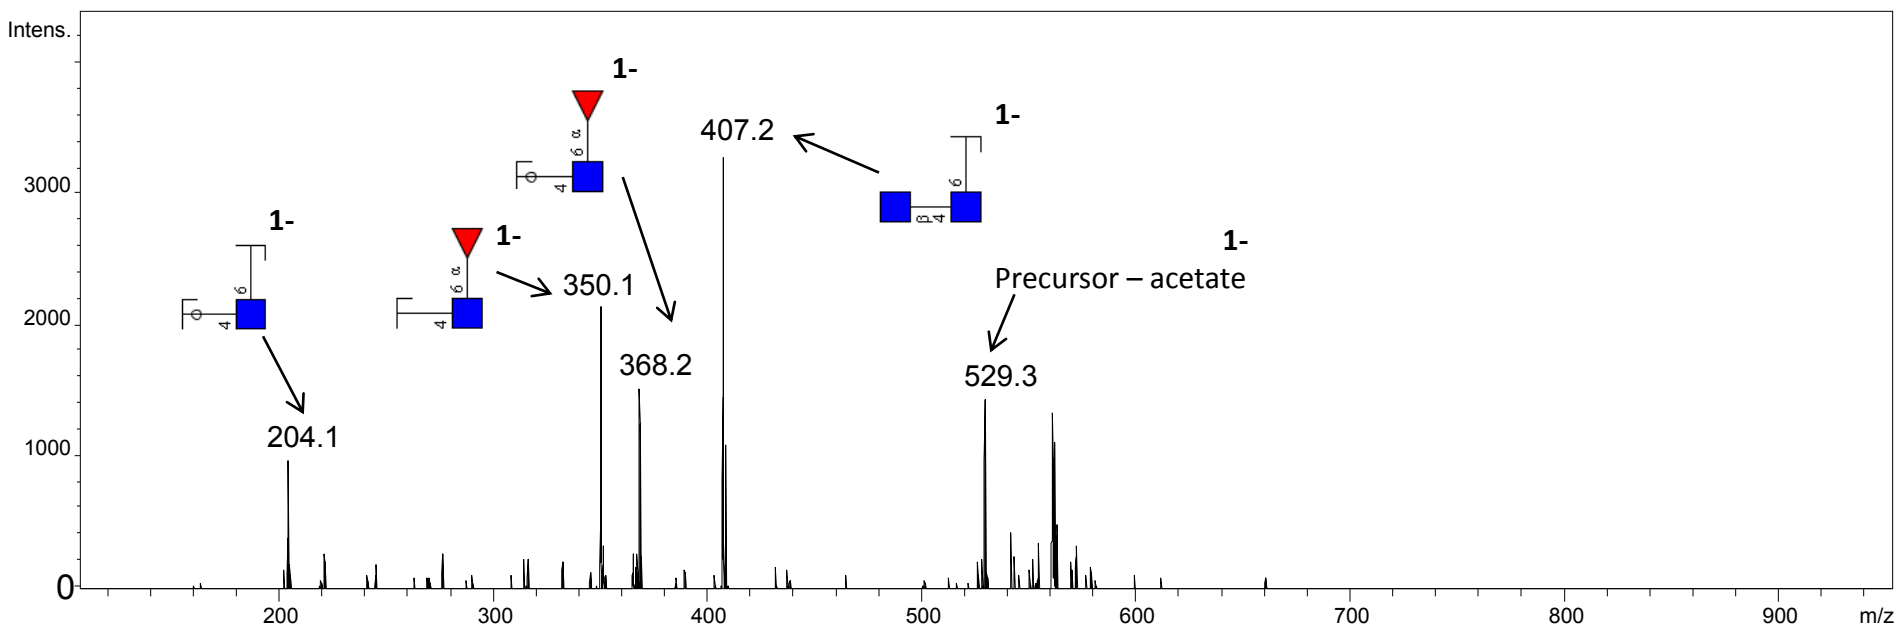

## Glycan # 2

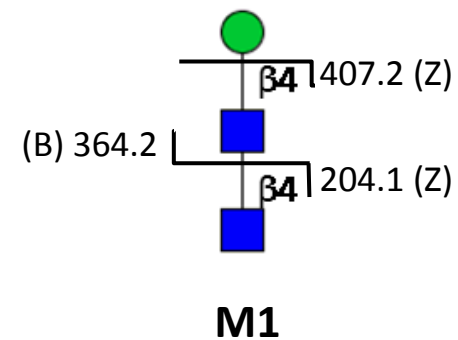

Observed  $m/z$  587.3 (1-), RT: 31.3 min  
[M-H]<sup>-</sup> 587.3

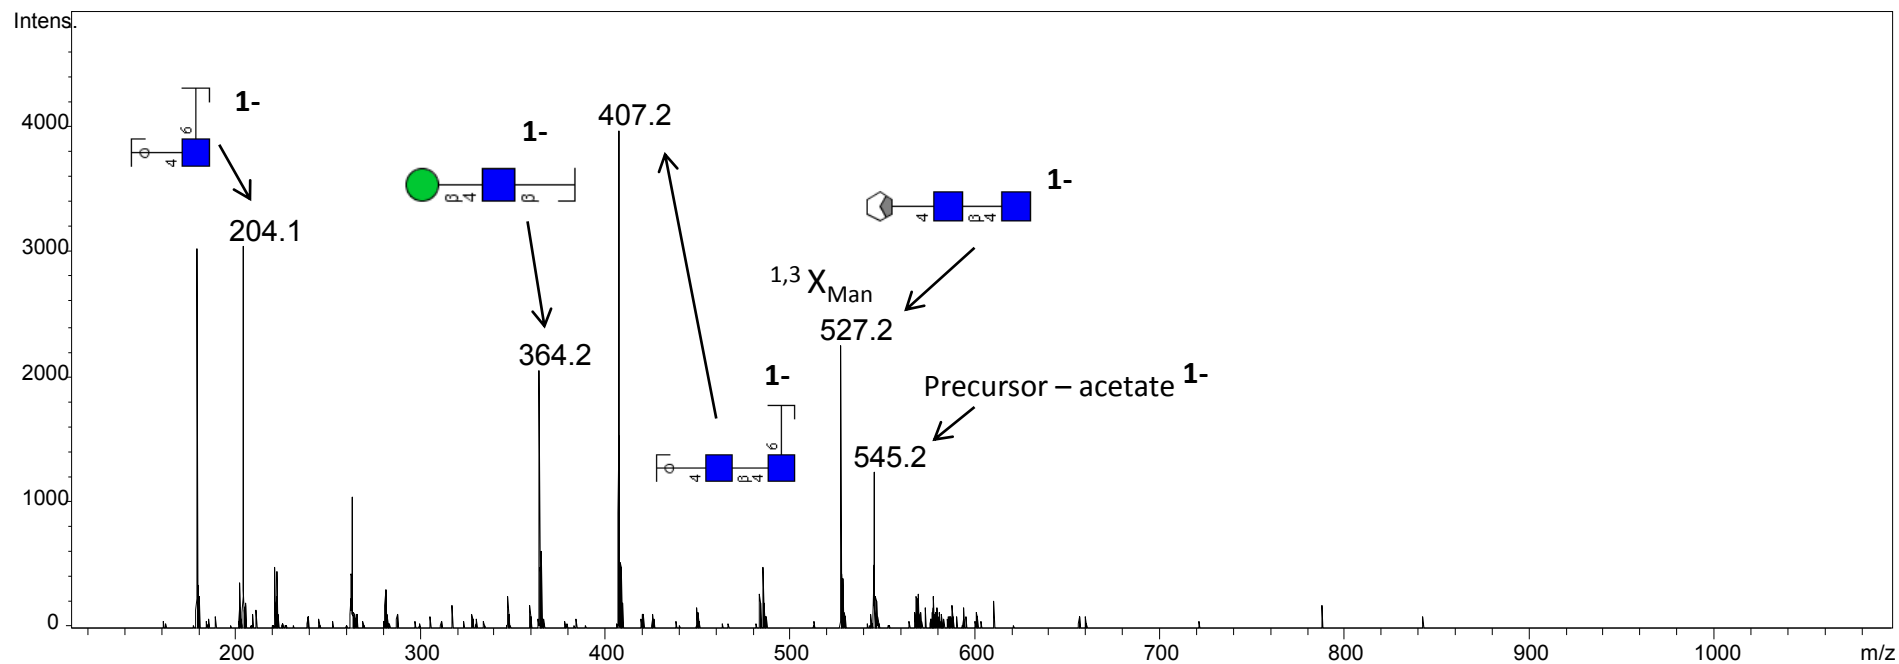

# Glycan # 3

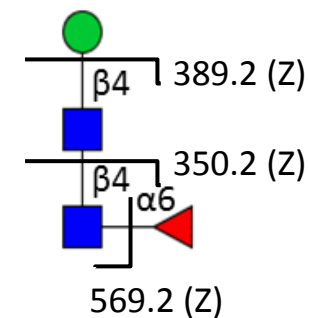

**M1F**

Observed  $m/z$  733.3 (1-), RT: 40.9 min  
 $[M-H]^-$  733.3

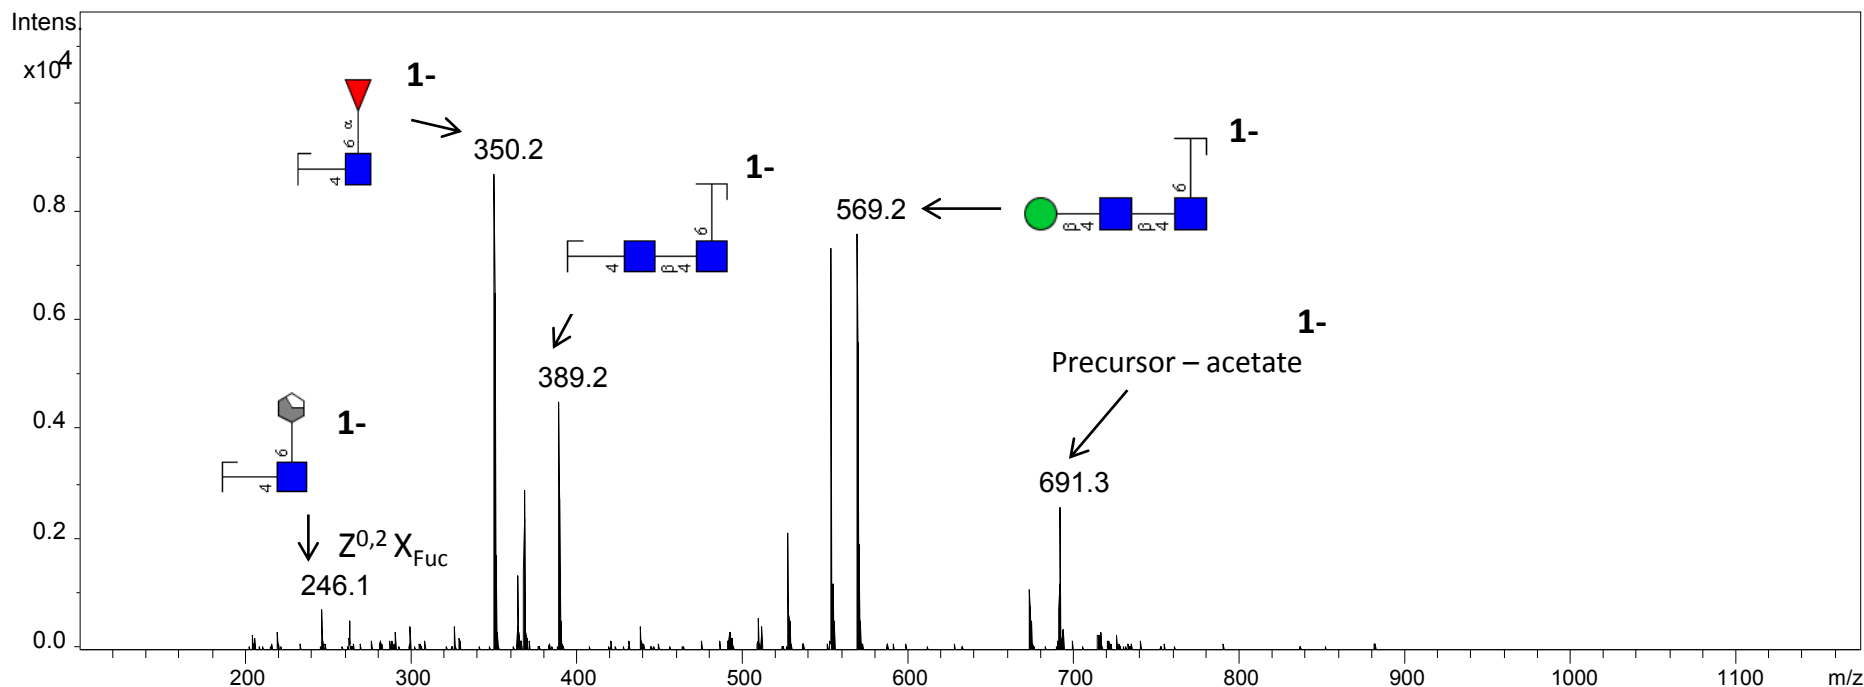



### Glycan # 4

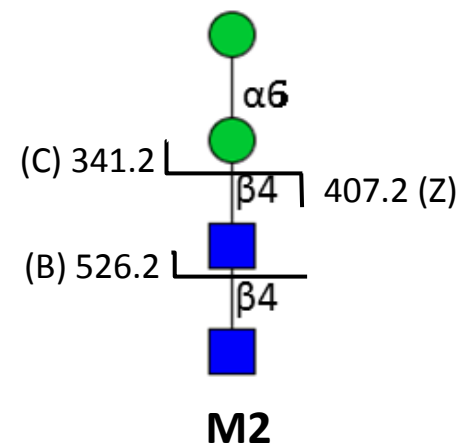

Observed  $m/z$  749.3(1-), RT: 36.1 min  
[M-H]<sup>-</sup> 749.3

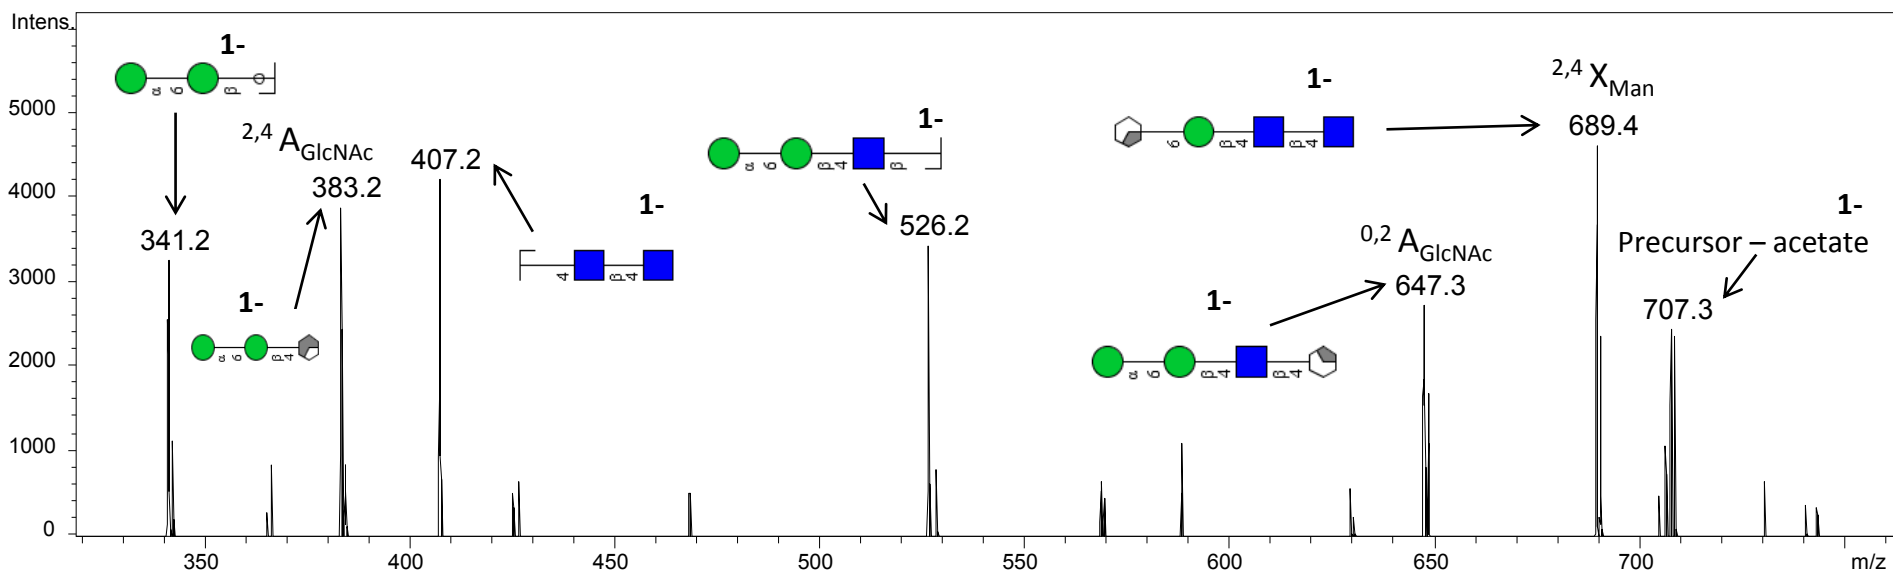

## Glycan # 5

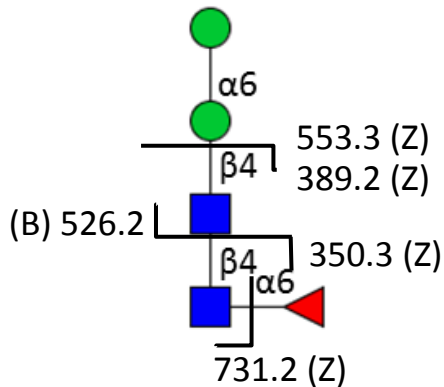

**M2F**

Observed  $m/z$  895.4 (1-), RT: 44.7 min  
[M-H]<sup>-</sup> 895.4

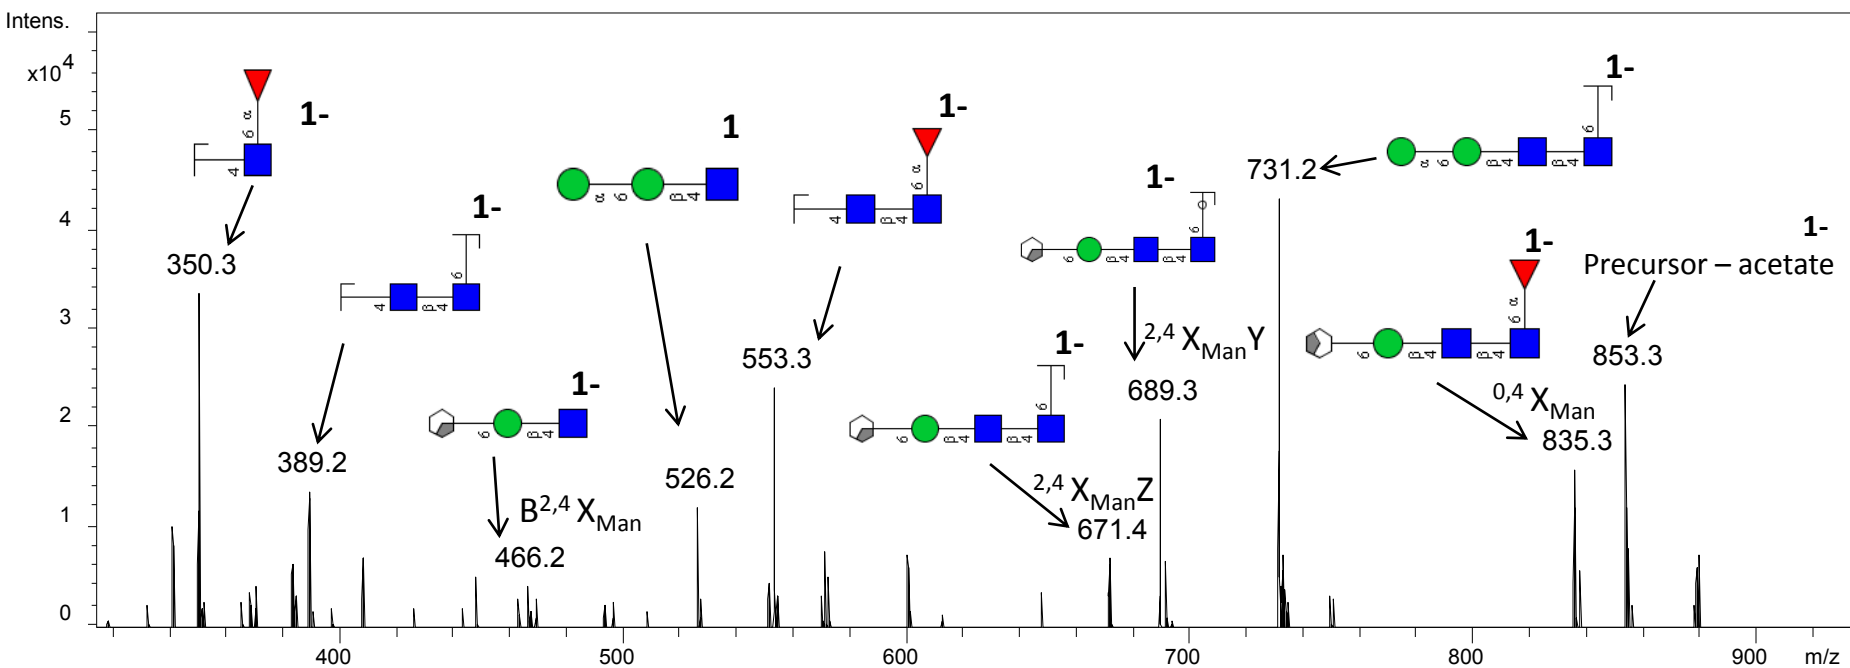

## Glycan # 6

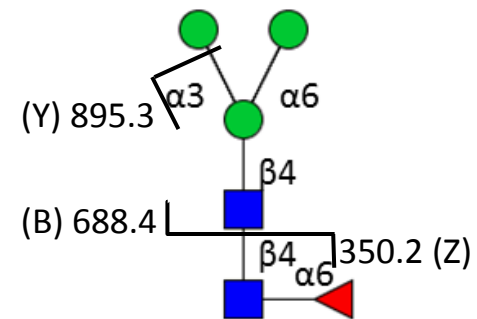

## M3F

Observed  $m/z$  1057.4 (1-), RT: 51 min  
[M-H]<sup>-</sup> 1057.4

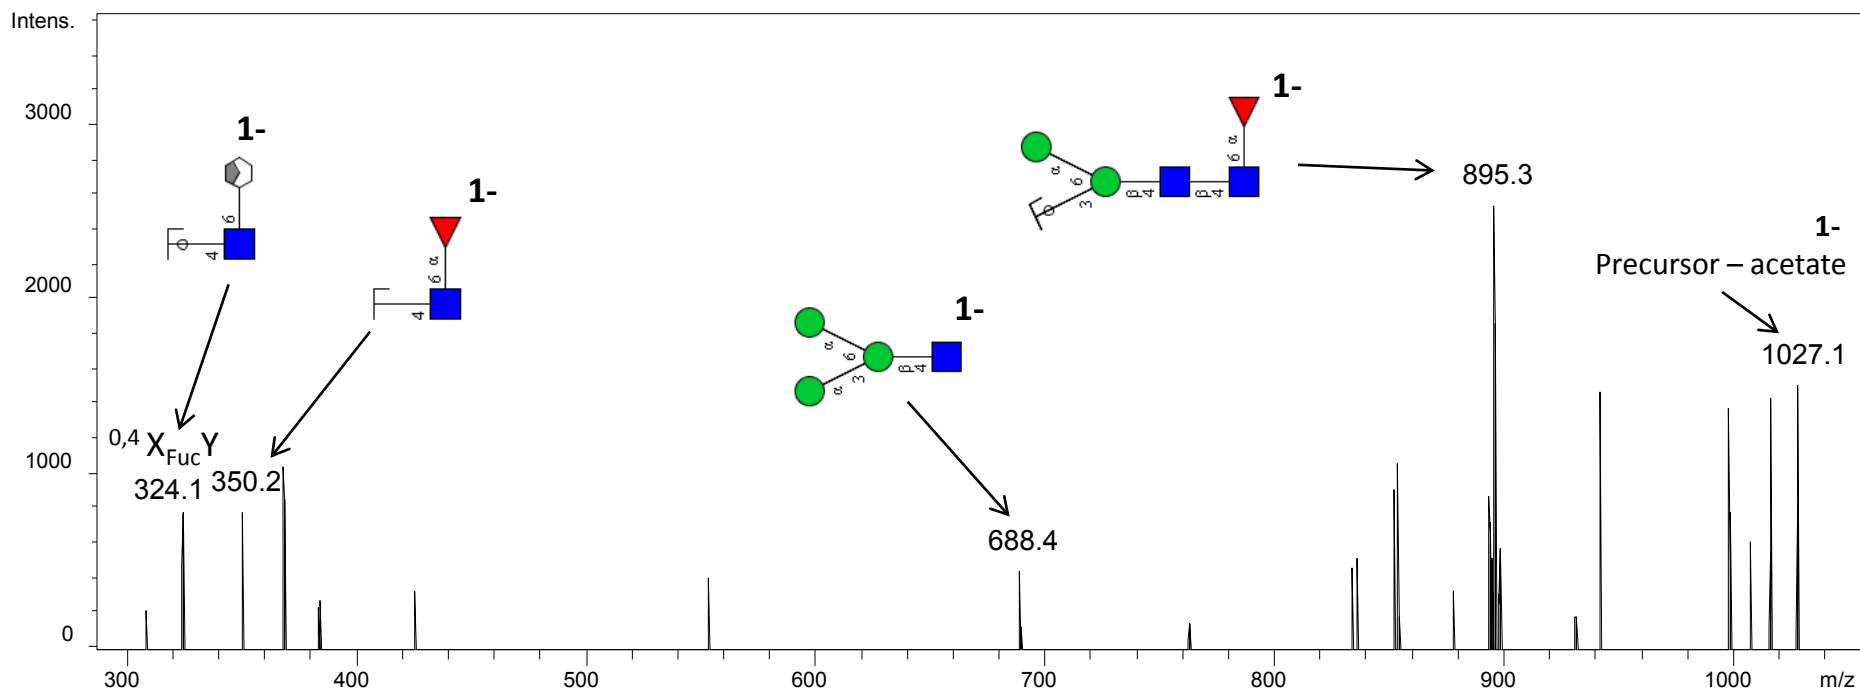

### Glycan # 7a

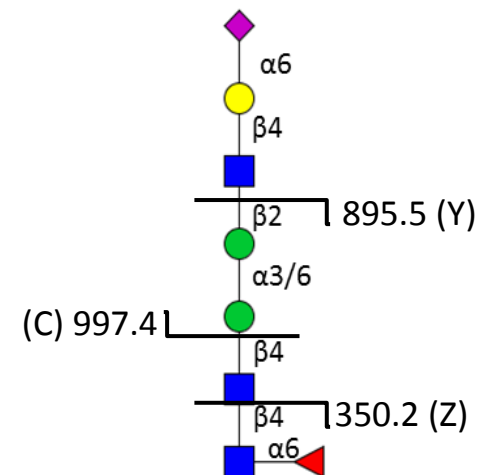

Observed  $m/z$  775.3 (2-), RT: 45.2 min  
[M-H]<sup>-</sup> 1552.6

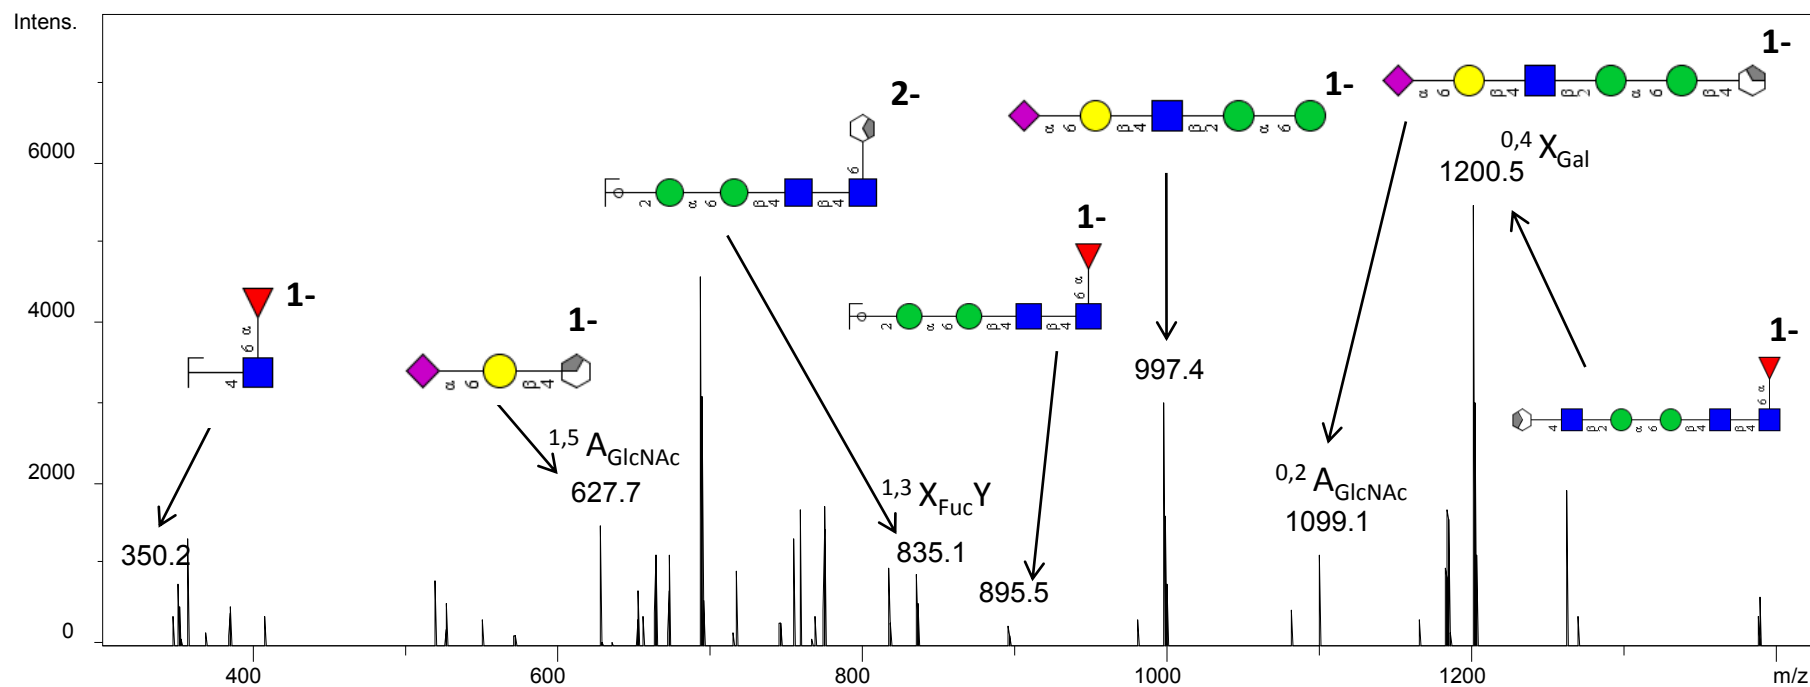

# Glycan # 7b

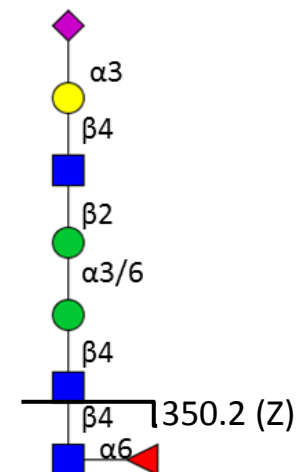

Observed  $m/z$  775.3 (2-), RT: 51.5 min  
 $[M-H]^-$  1552.6

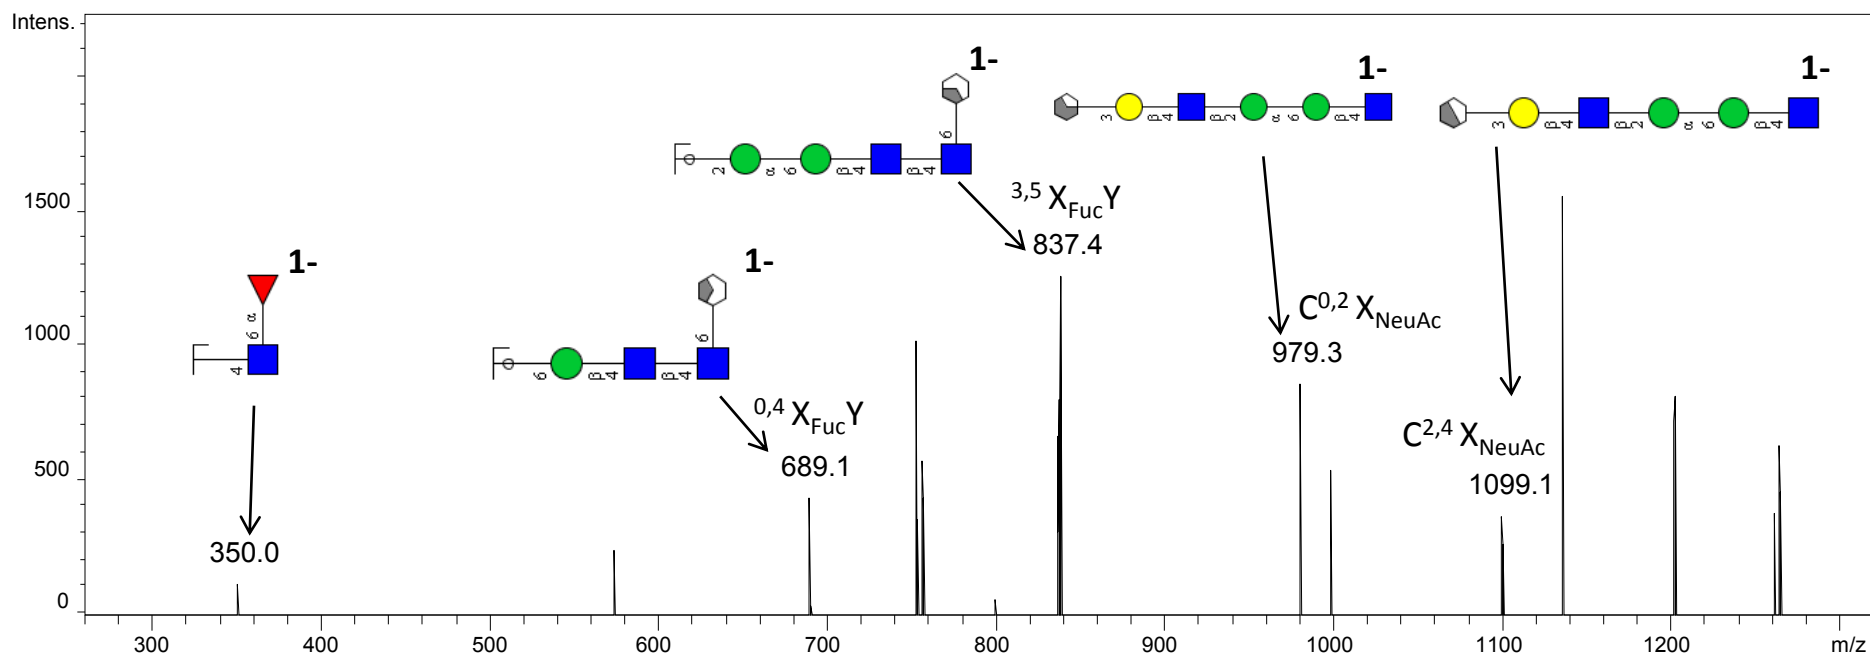



# Glycan # 9a

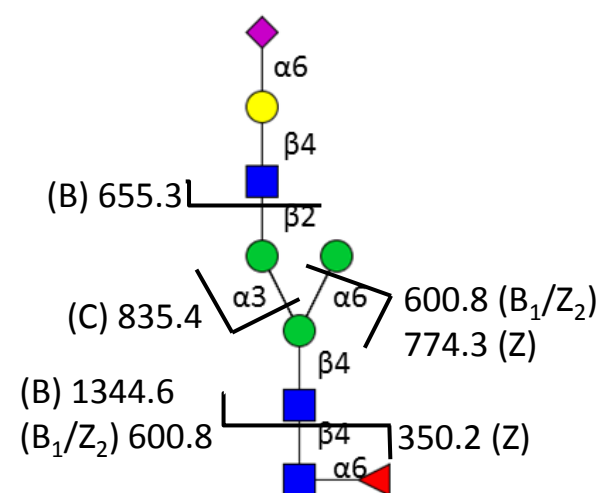

Observed  $m/z$  856.4 (2-), RT: 47.5 min  
 $[M-H]^-$  1713.8

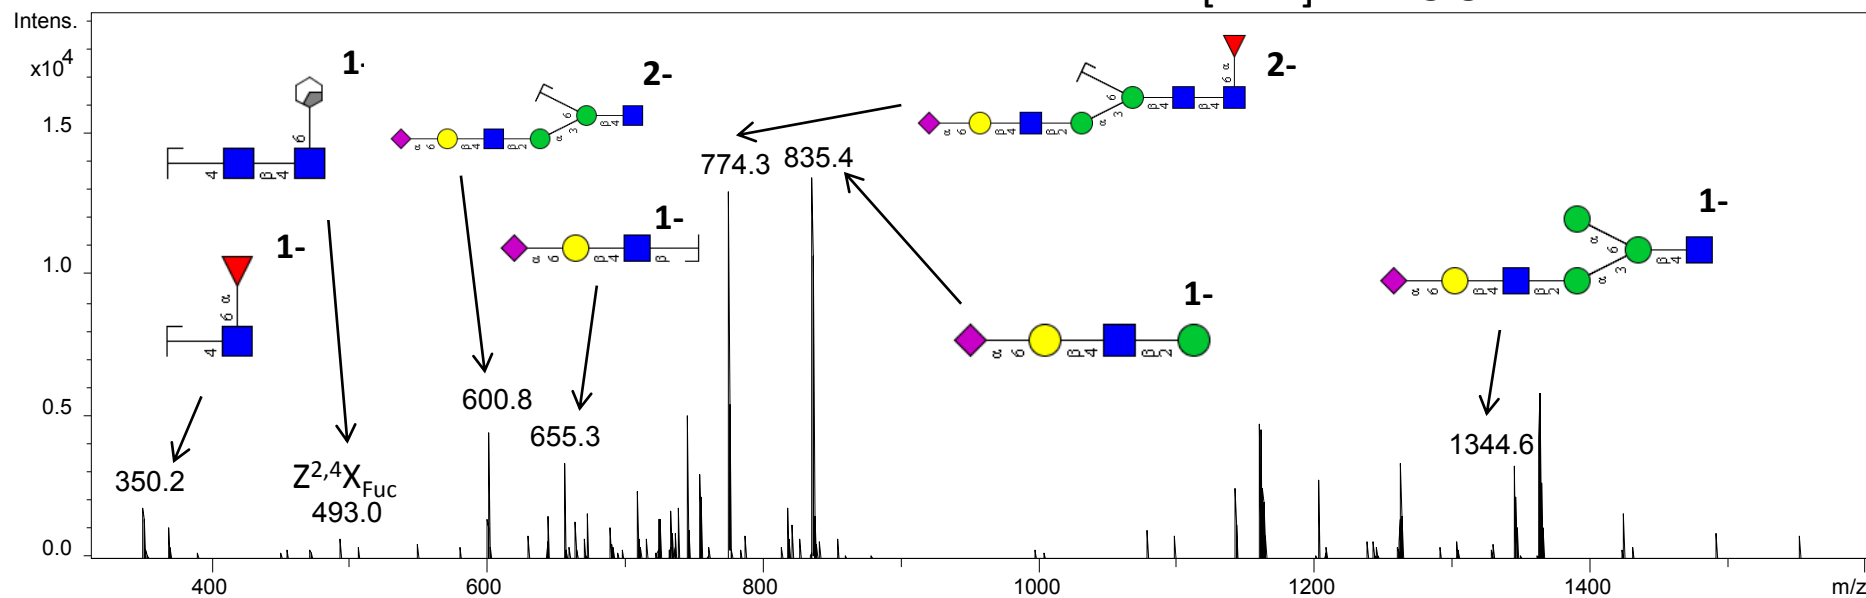

# Glycan # 9b

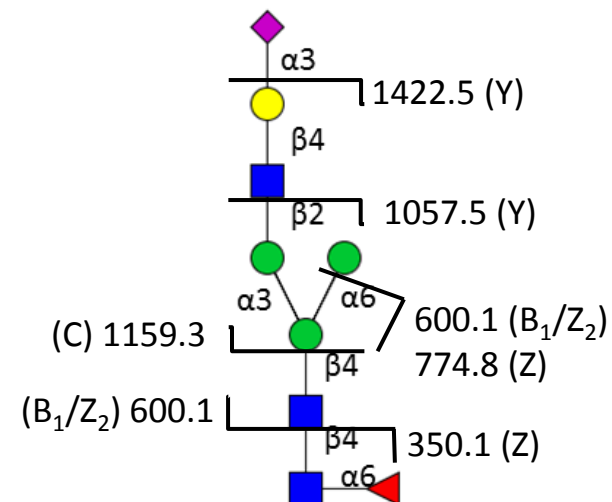

Observed  $m/z$  856.4 (2-), RT: 55.1 min  
 $[M-H]^-$  1713.8

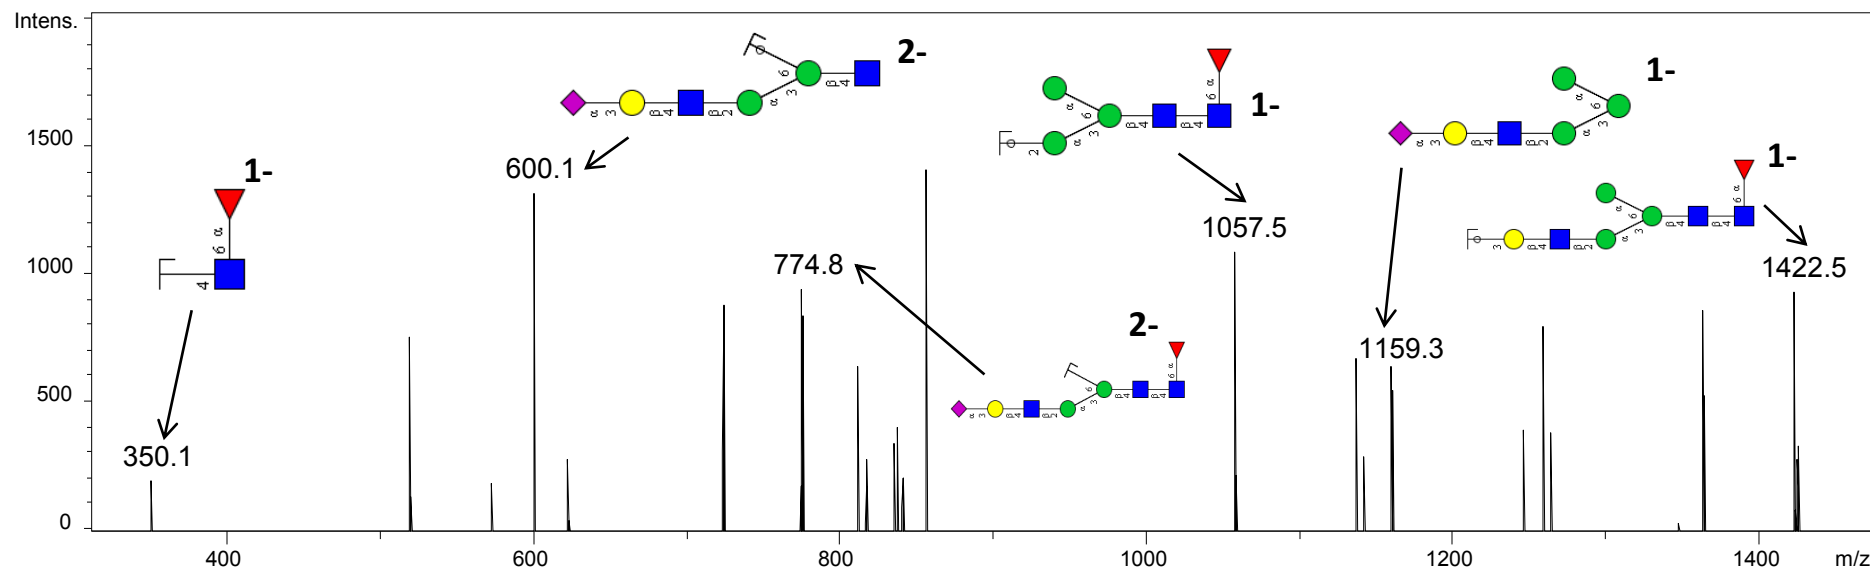



**Supplementary Figure S4.** Annotated RP-LC-ESI-CID/ETD-MS/MS spectra of all *N*-glycopeptides identified from the unenriched chymotryptic peptide mixture of the nCG protein preparation. CID-MS/MS spectra of the nCG C-terminal variants i.e. Arg243 and Ser244 C-terminal peptides are also shown.

**Human neutrophil cathepsin G – P08311**

IRTTMR (Arg243)

Obs.  $m/z$  389.3 (2+)

Obs.  $[M+H]^+ = 777.6$  Da

Arginine terminating C-terminal variant

Calc.  $[M+H]^+ = 777.4$  Da

Retention time: 18.2 min

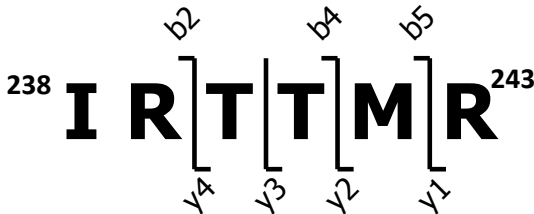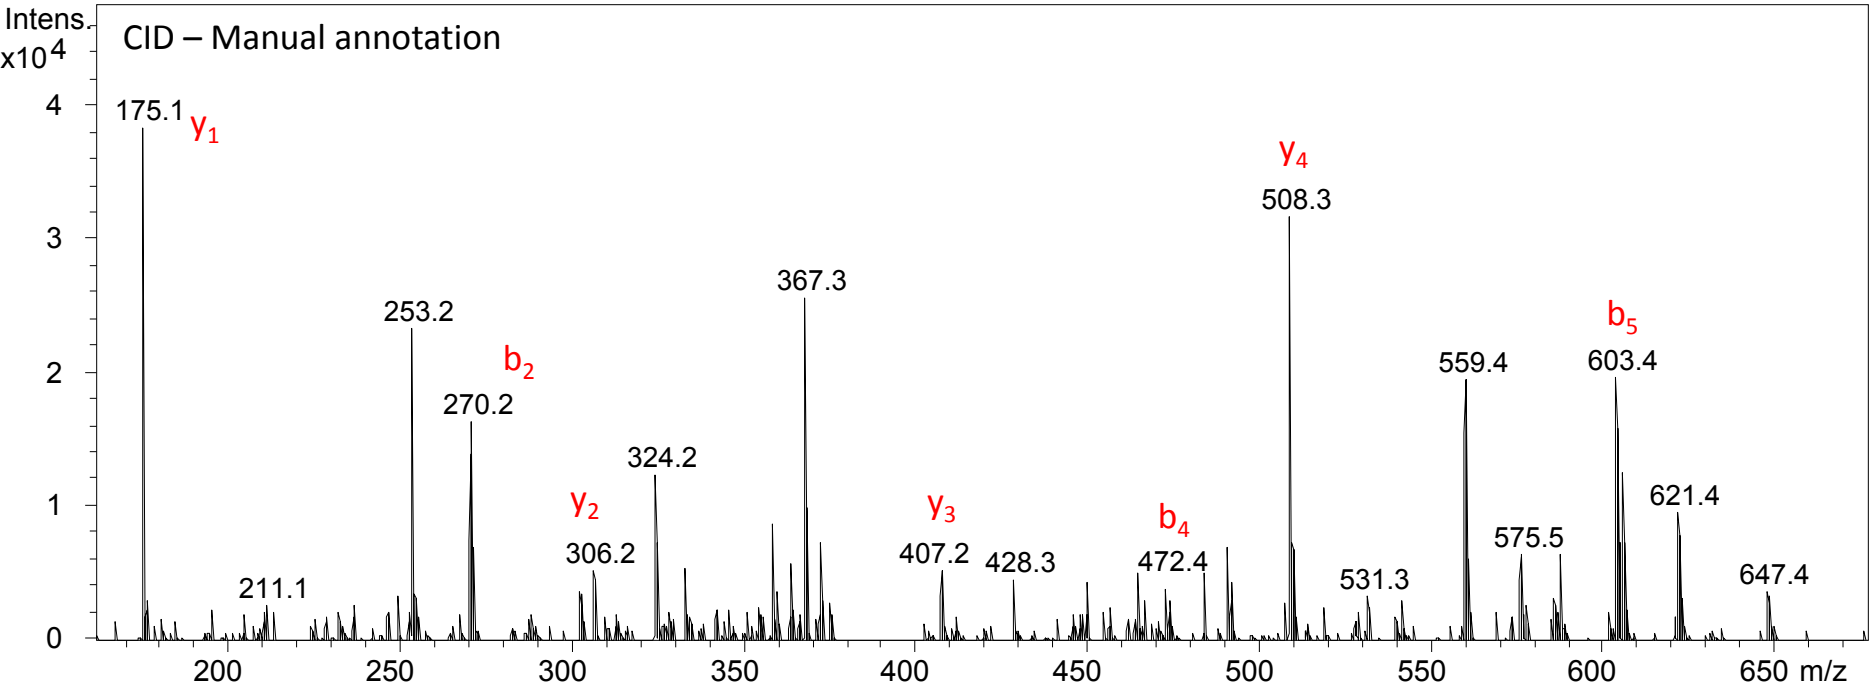

Human neutrophil cathepsin G – P08311

IRTTMRS (Ser244)

Obs.  $m/z$  432.9 (2+)

Obs.  $[M+H]^+ = 864.8$  Da

Serine terminating C-terminal variant

Calc.  $[M+H]^+ = 864.4$  Da

Retention time: 18.3 min

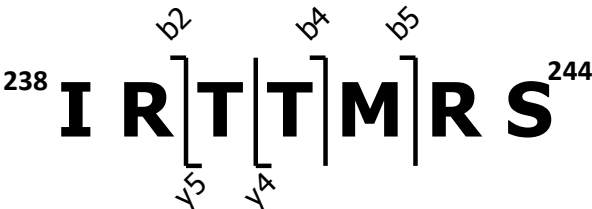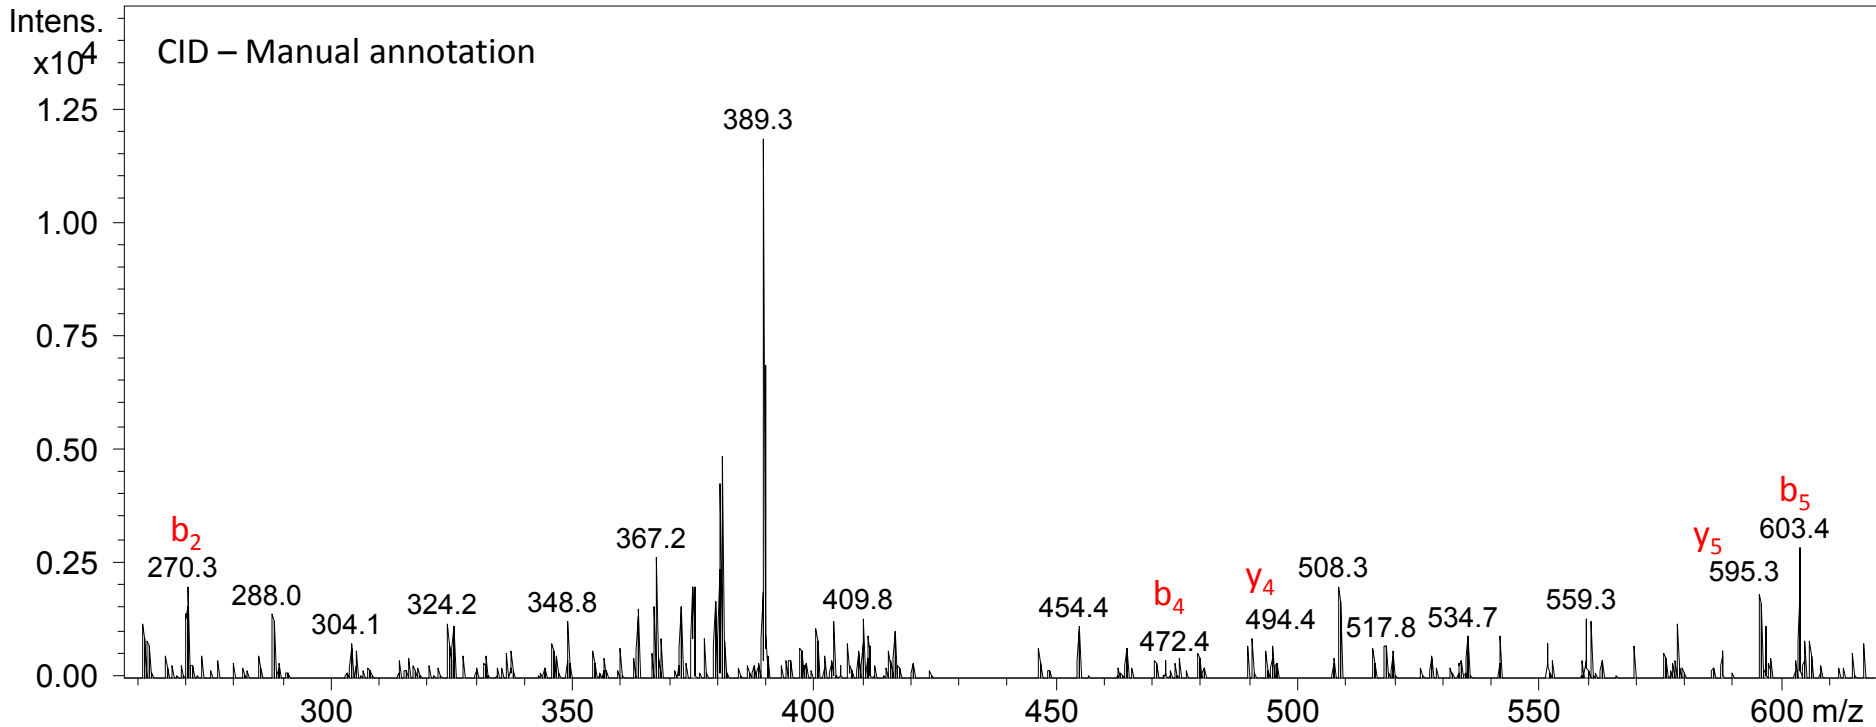

Human neutrophil cathepsin G – P08311

GSNINVTL (Asn71)

Obs. *m/z* 510.8 (2+)

Obs. [M+H]<sup>+</sup> = 1020.6 Da

Glycan: 204.09 Da (HexNAc<sub>1</sub>)

Calc. [M+H]<sup>+</sup> = 1020.5 Da

Retention time: 39.7 min

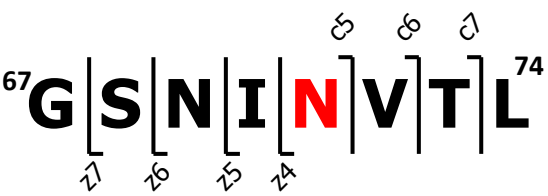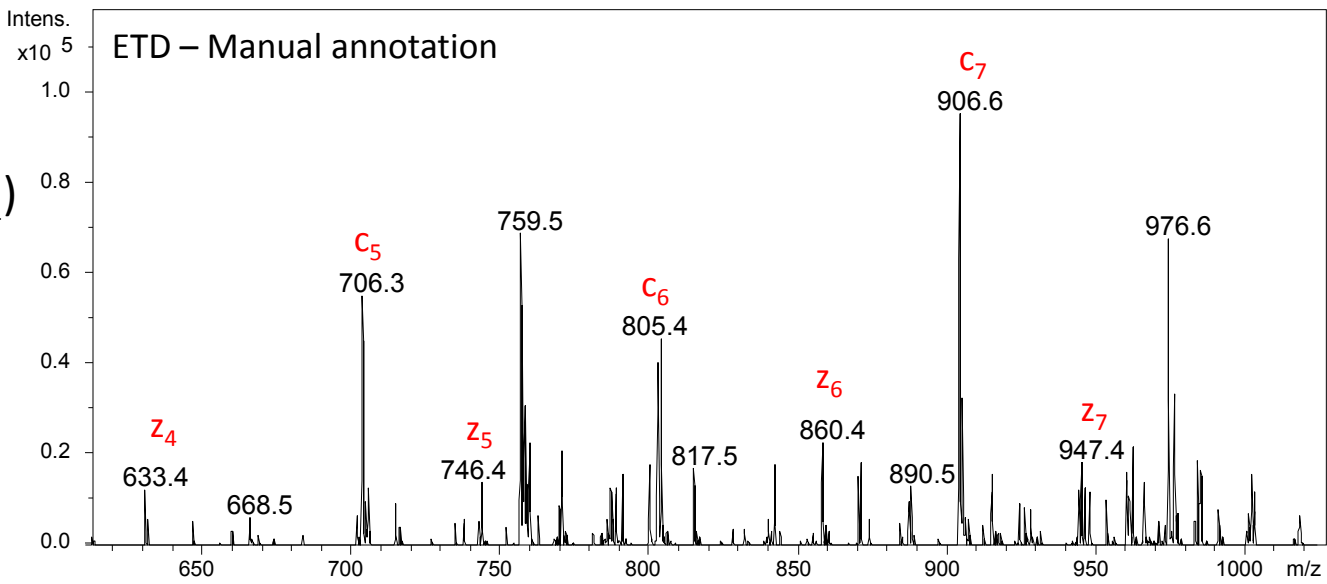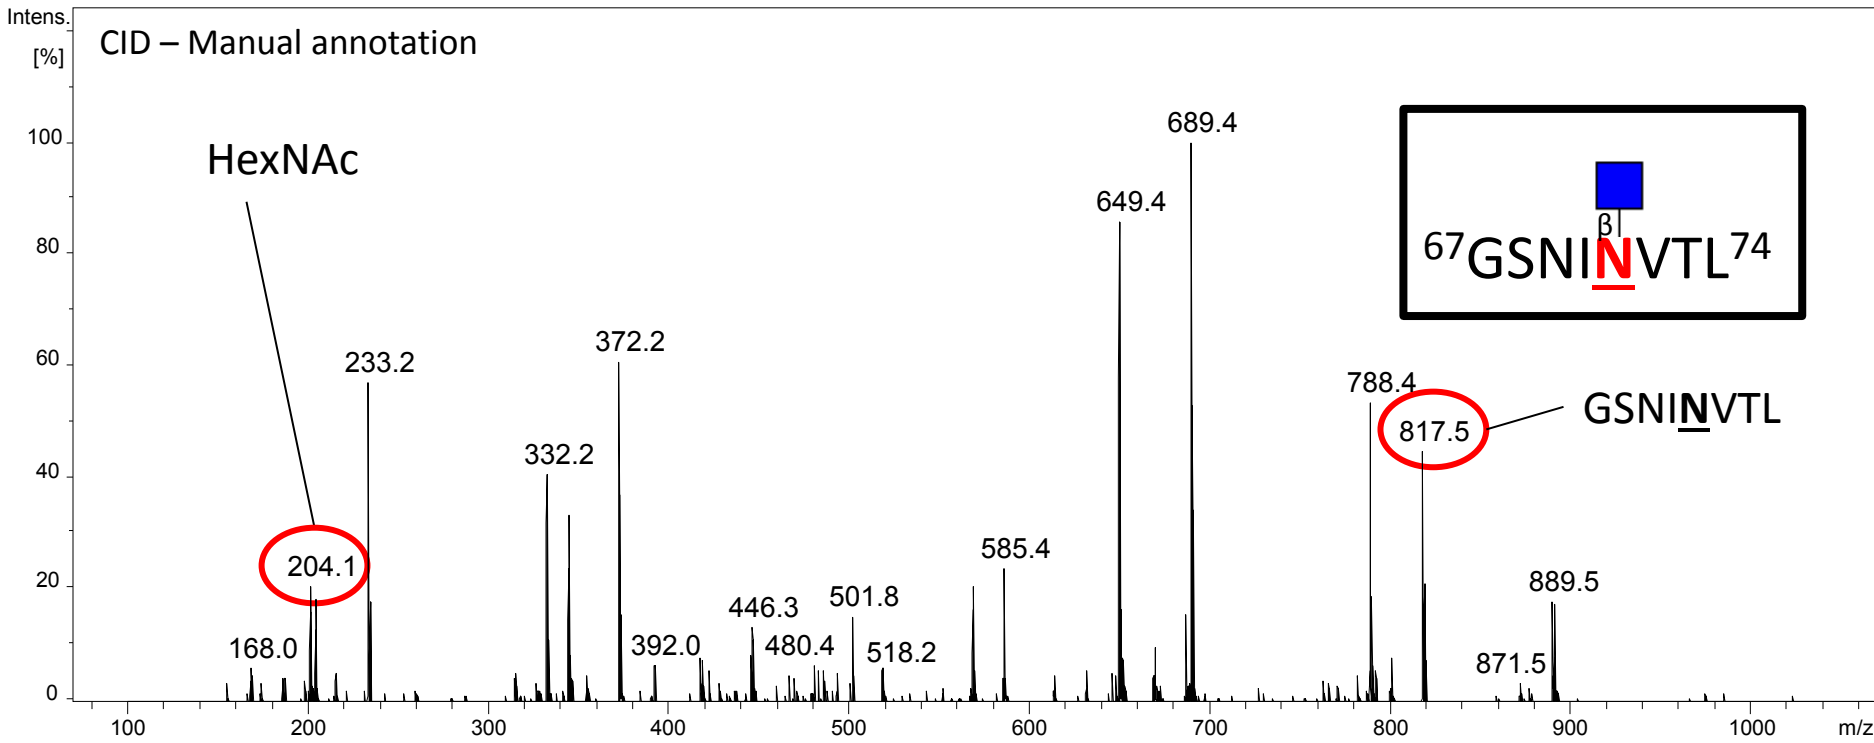

# Human neutrophil cathepsin G – P08311

GSNINVTL (Asn71)

Obs.  $m/z$  583.8 (2+)

Obs.  $[M+H]^+ = 1166.6$  Da

Glycan: 349.1 Da (Fuc<sub>1</sub>HexNAc<sub>1</sub>)

Calc.  $[M+H]^+ = 1166.5$  Da

Retention time: 39.3 min

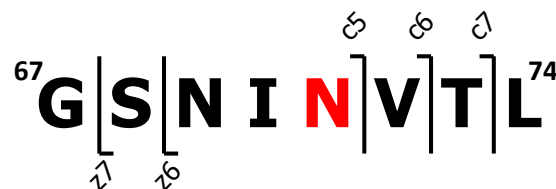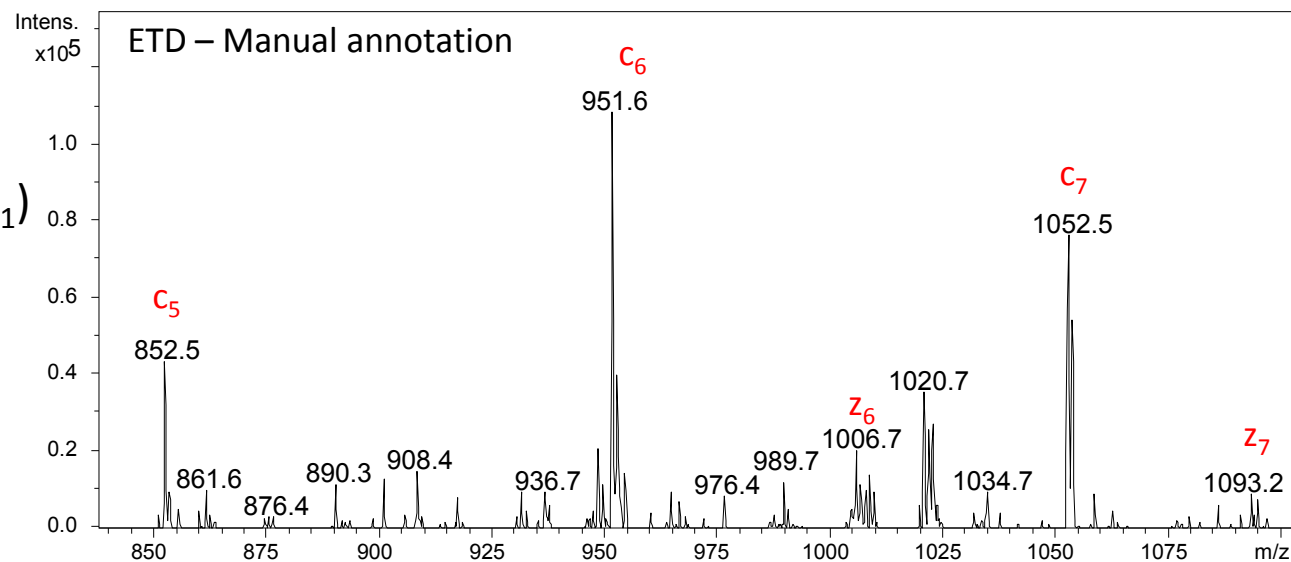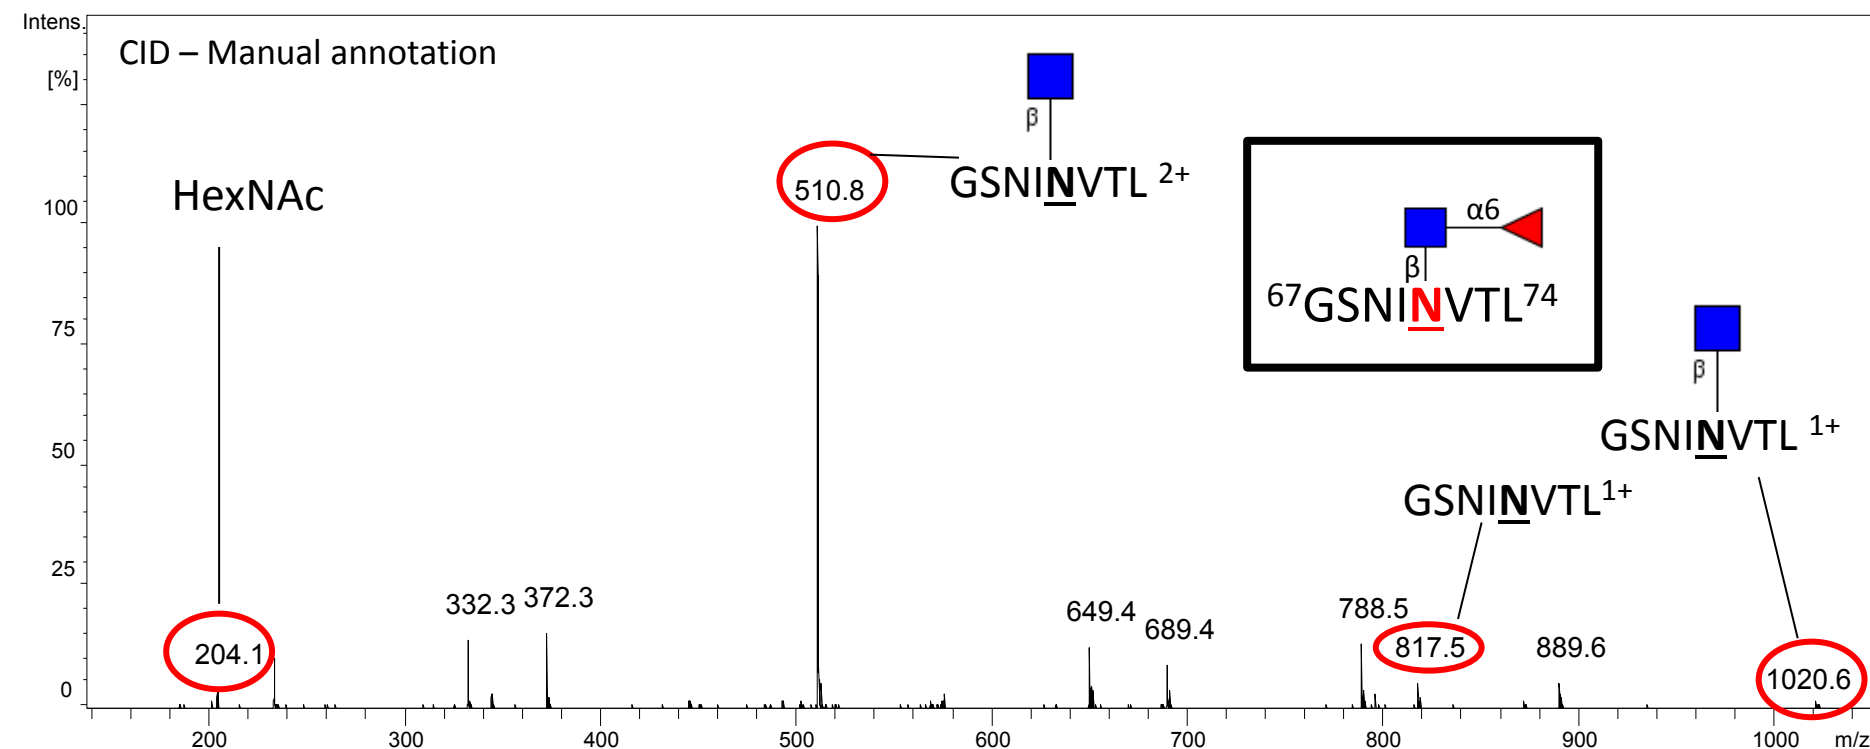

# Human neutrophil cathepsin G – P08311

GSNINVTL (Asn71)

Obs.  $m/z$  693.8 (2+)

Obs.  $[M+H]^+ = 1386.6$  Da

Glycan: 568.2 Da (Hex<sub>1</sub>HexNAc<sub>2</sub>)

Calc.  $[M+H]^+ = 1385.6$  Da

Retention time: 39.6 min

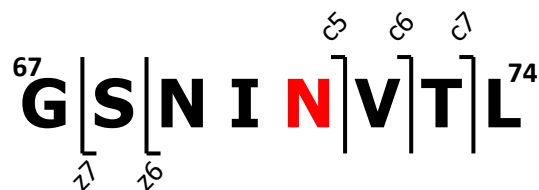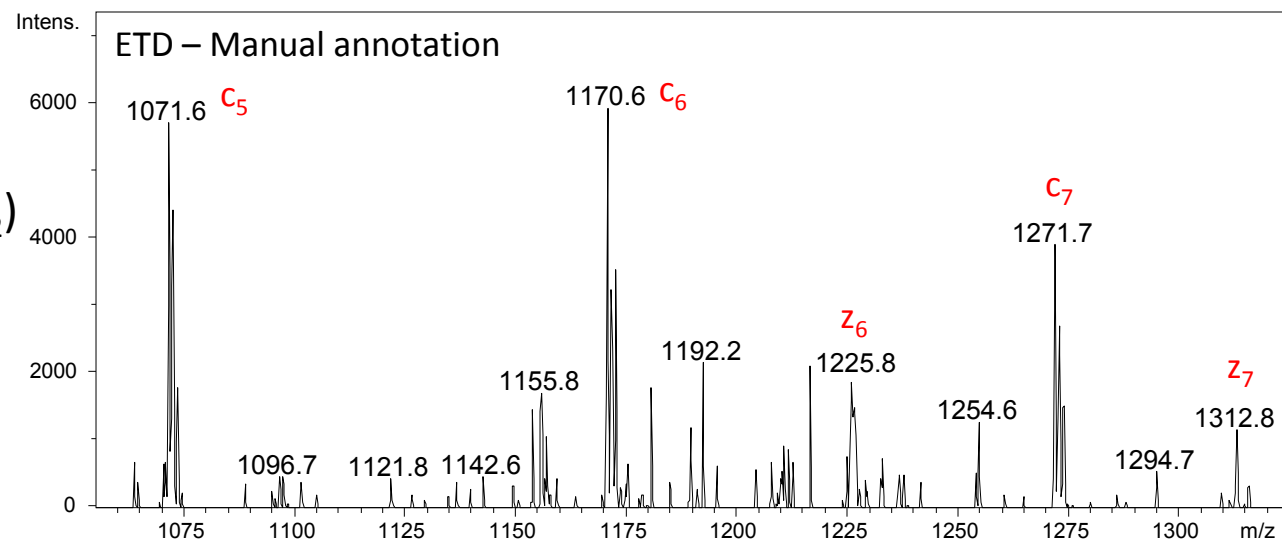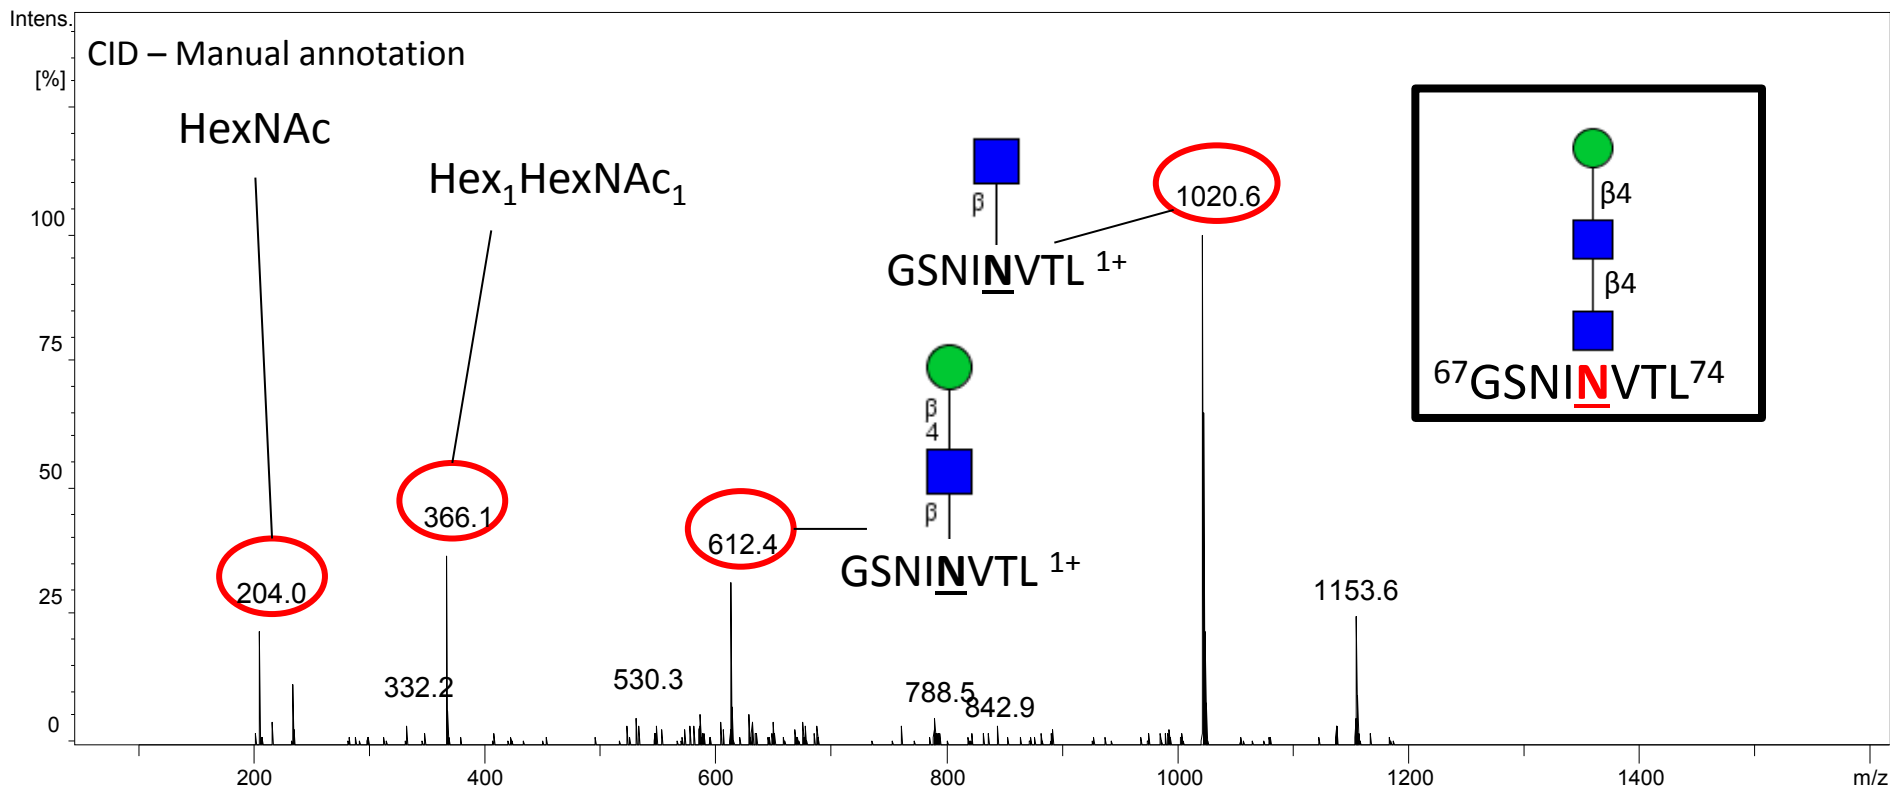

# Human neutrophil cathepsin G – P08311

GSNINV (Asn71)

Obs.  $m/z$  586.7 (2+)

Obs.  $[M+H]^+ = 1172.4$  Da

Glycan: 568.2 Da (Hex<sub>1</sub>HexNAc<sub>2</sub>)

Calc.  $[M+H]^+ = 1171.5$  Da

Retention time: 24.7 min

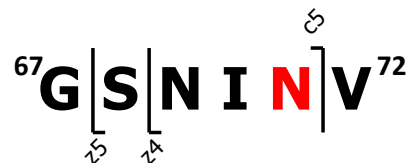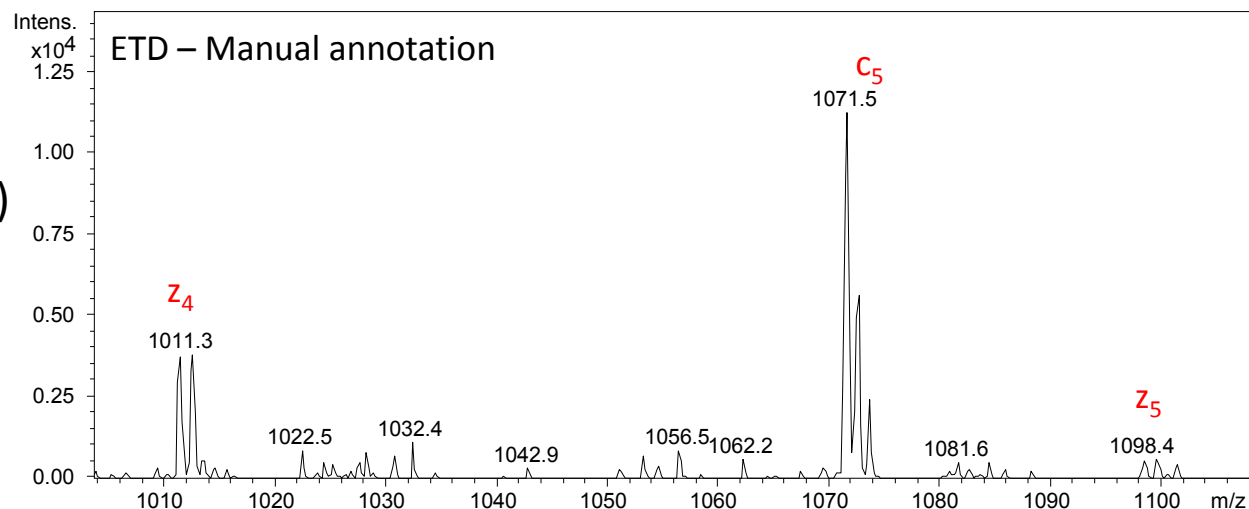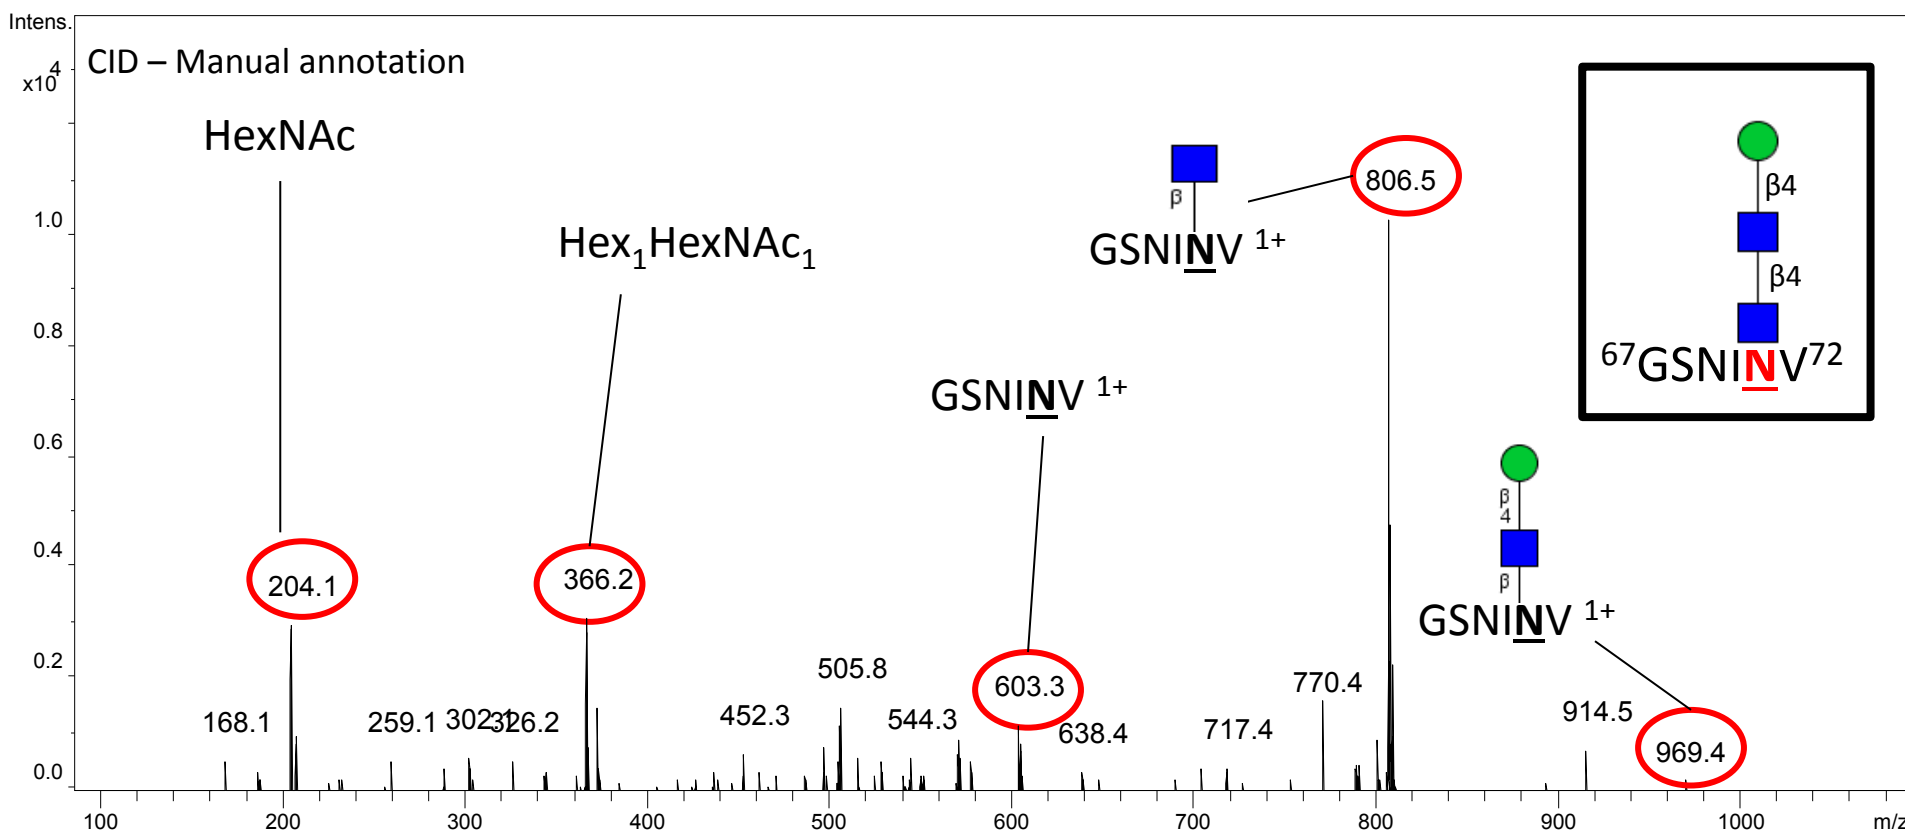

# Human neutrophil cathepsin G – P08311

GSNINV (Asn71)

Obs.  $m/z$  659.4 (2+)

Obs.  $[M+H]^+ = 1317.8$  Da

Glycan: 714.2 Da (Fuc<sub>1</sub>Hex<sub>1</sub>HexNAc<sub>2</sub>)

Calc.  $[M+H]^+ = 1317.5$  Da

Retention time: 26.1 min

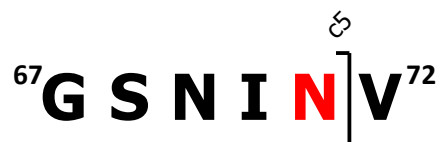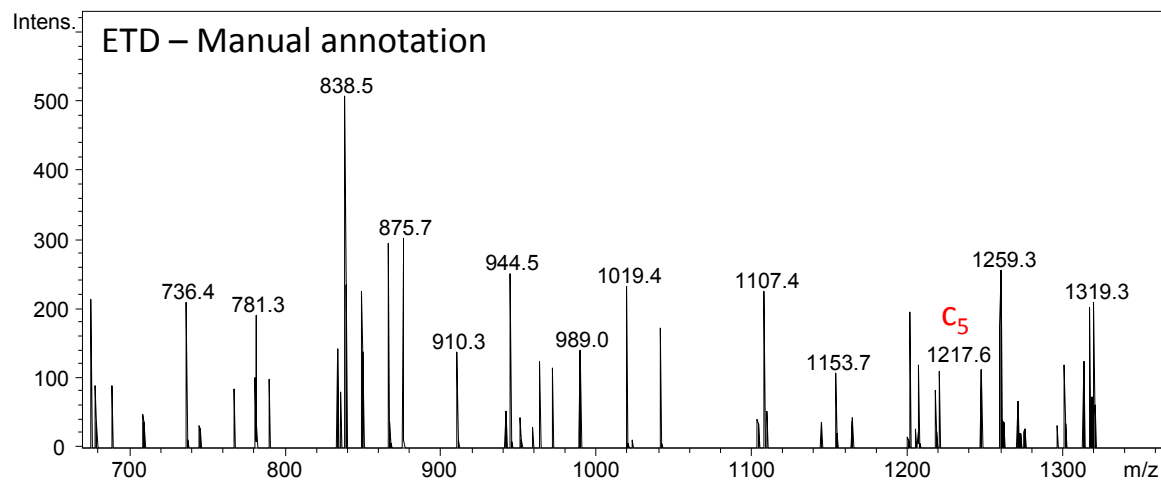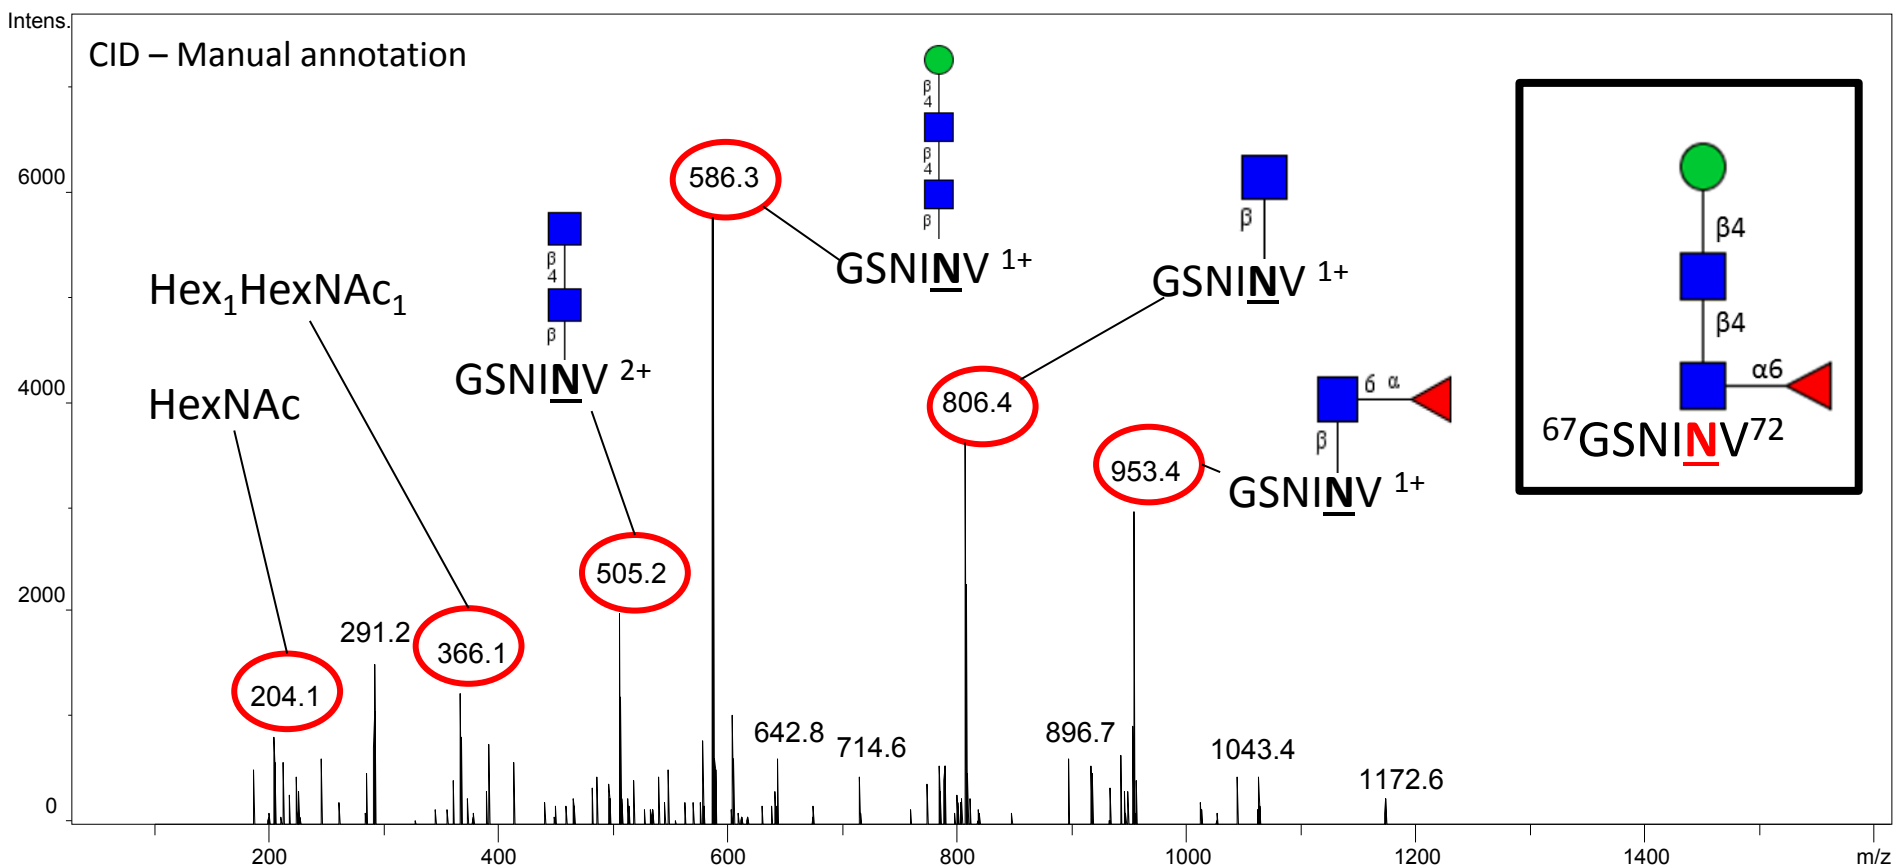



# Human neutrophil cathepsin G – P08311

GSNINV (Asn71)

Obs.  $m/z$  667.8 (2+)

Obs.  $[M+H]^+ = 1334.6$  Da

Glycan: 730.2 Da (Hex<sub>2</sub>HexNAC<sub>2</sub>)

Calc.  $[M+H]^+ = 1333.5$  Da

Retention time: 24.4 min

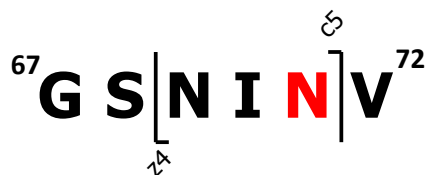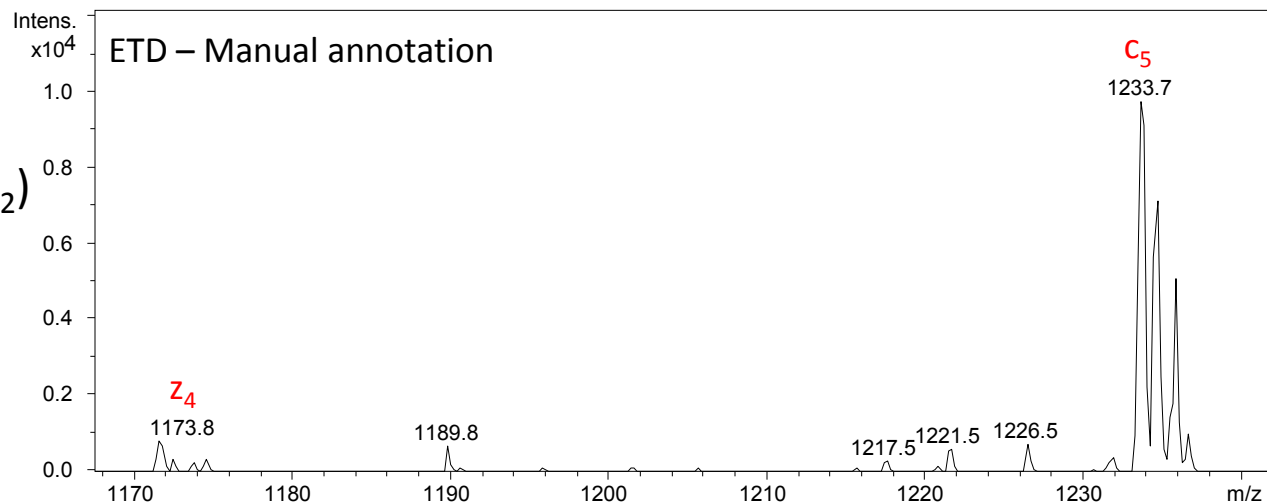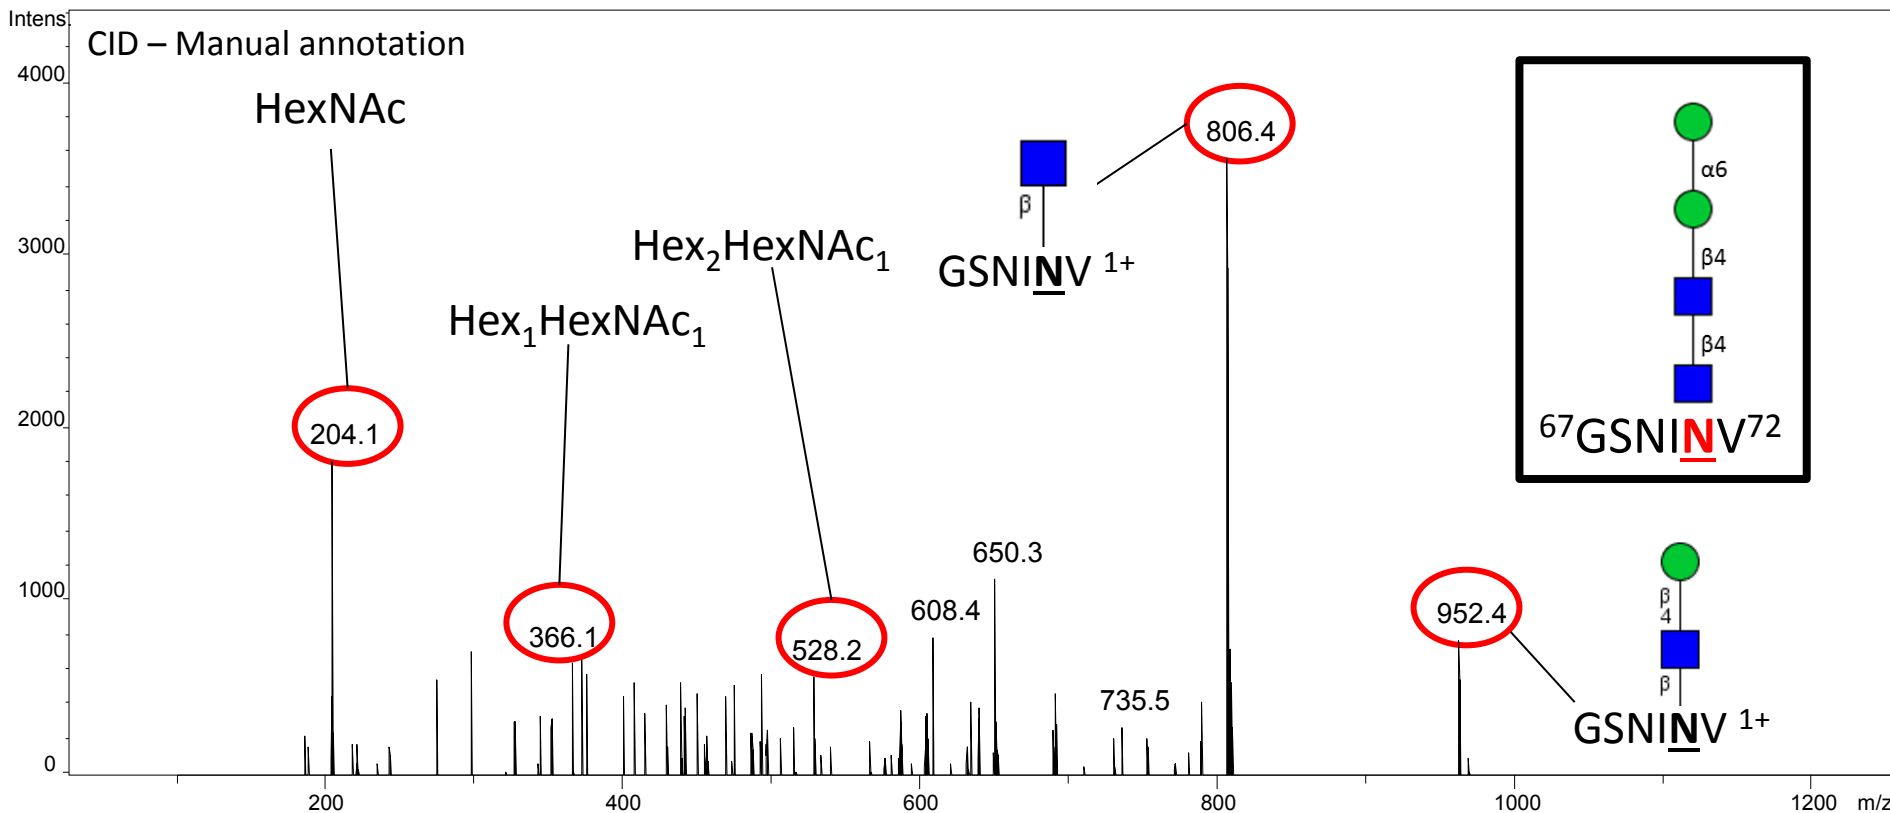

# Human azurocidin – P20160

SRFPRFVNV (Asn171)

Obs.  $m/z$  612.7 (3+)

Obs.  $[M+H]^+ = 1836.1$  Da

Glycan: 714.2 Da (Fuc<sub>1</sub>Hex<sub>1</sub>HexNAc<sub>2</sub>)

Calc.  $[M+H]^+ = 1835.8$  Da

Retention time: 43.0 min

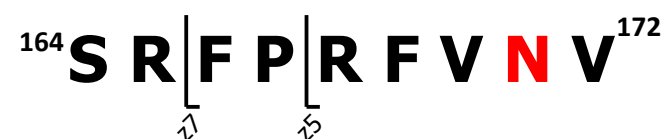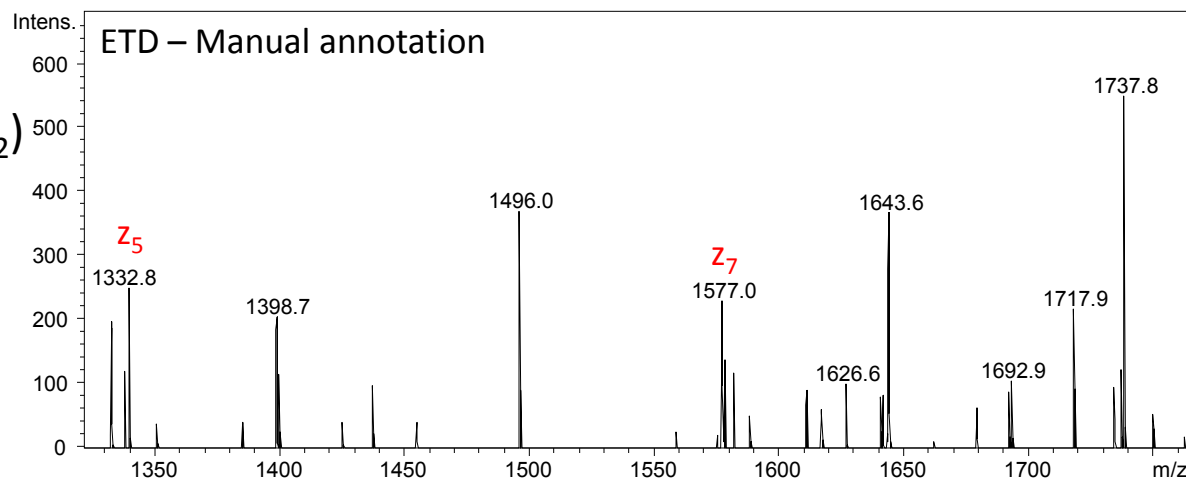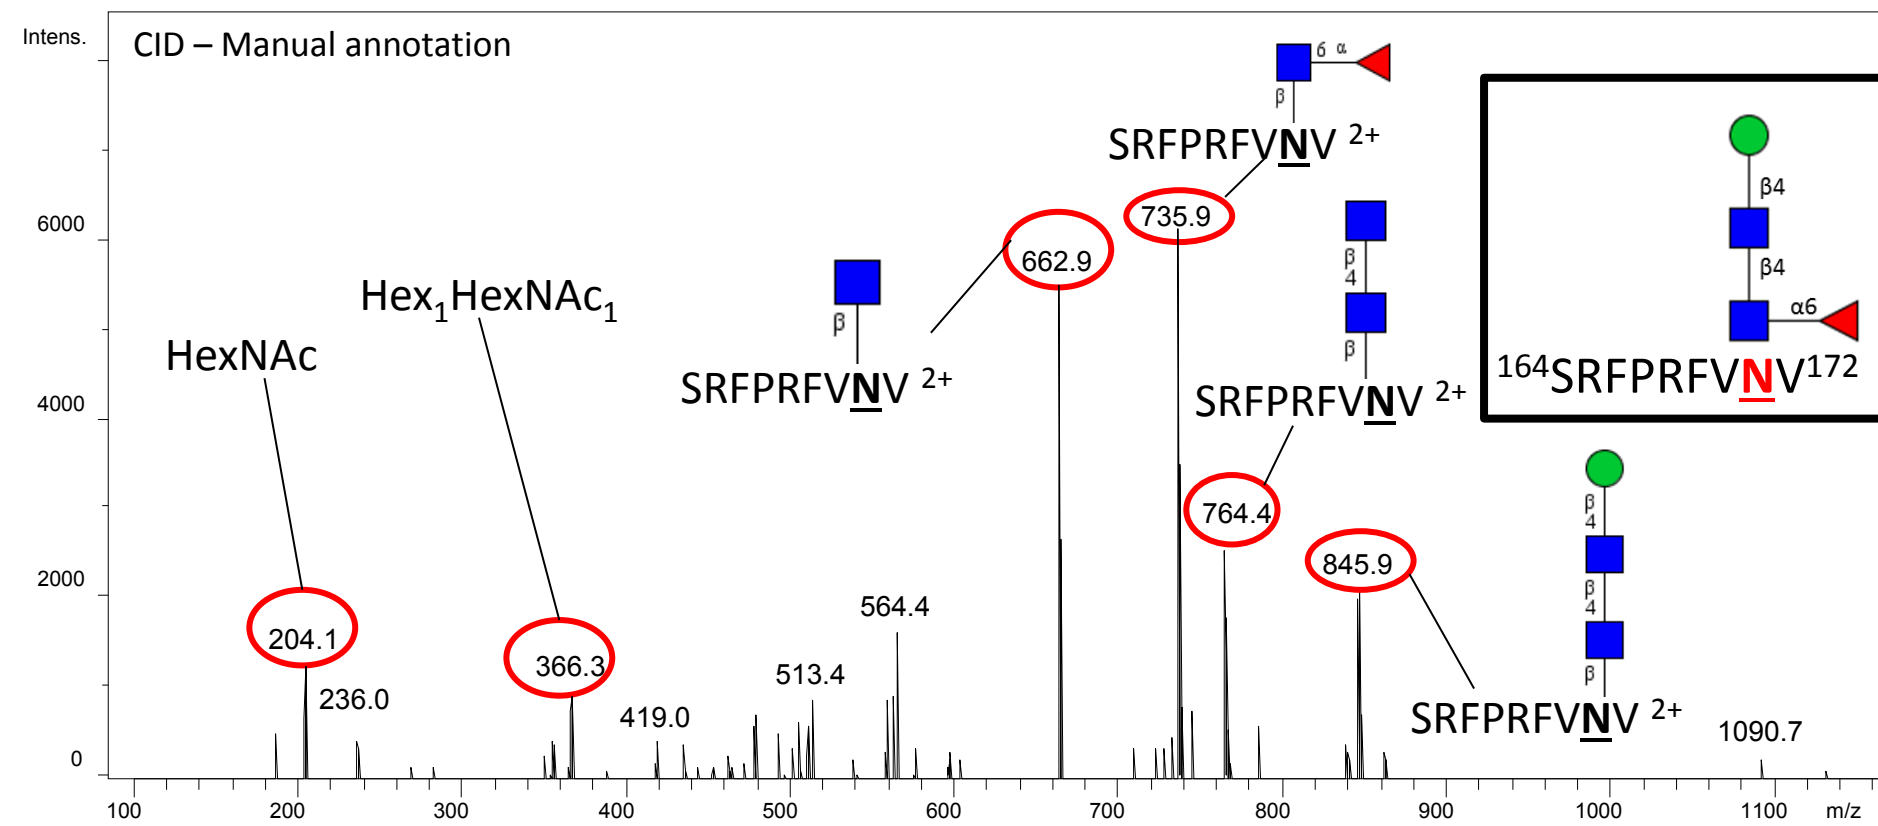

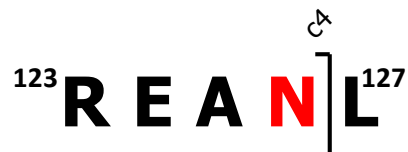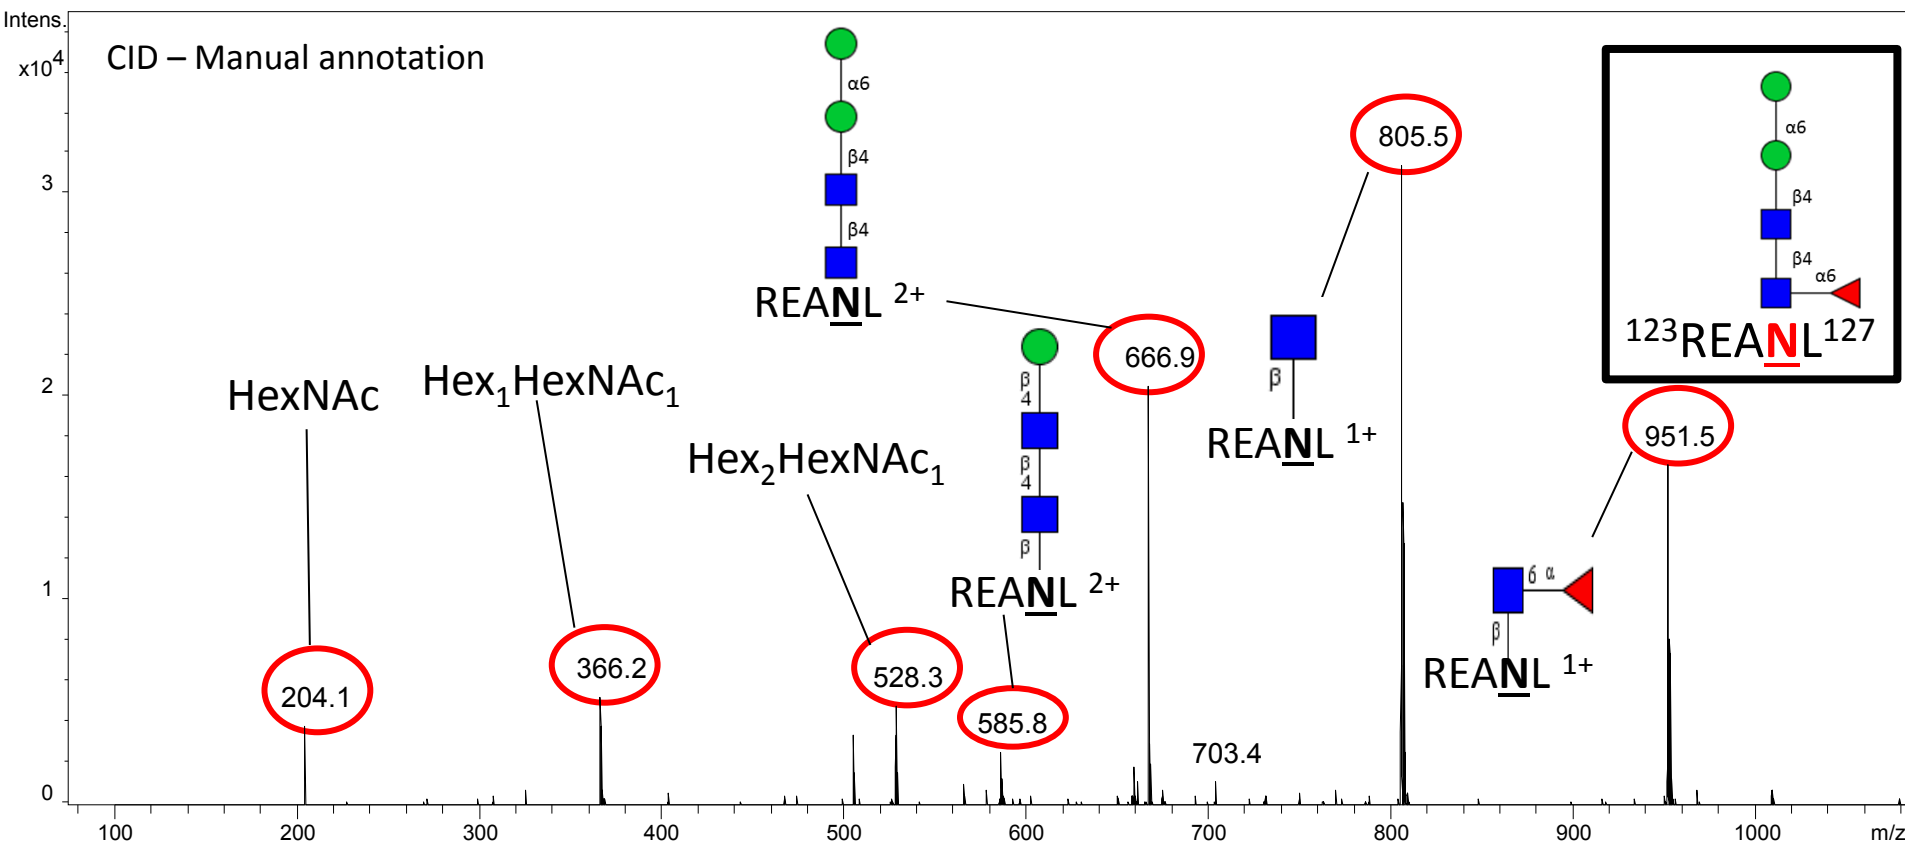

# Human azurocidin – P20160

REANLTSSV (Asn126)

Obs.  $m/z$  927.0 (2+)

Obs.  $[M+H]^+ = 1853.0$  Da

Glycan: 876.8 Da (Fuc<sub>1</sub>Hex<sub>2</sub>HexNAc<sub>2</sub>)

Calc.  $[M+H]^+ = 1852.8$  Da

Retention time: 25.8 min

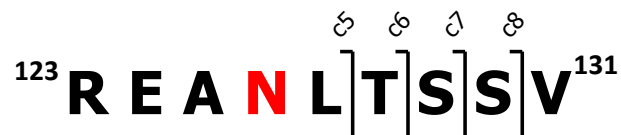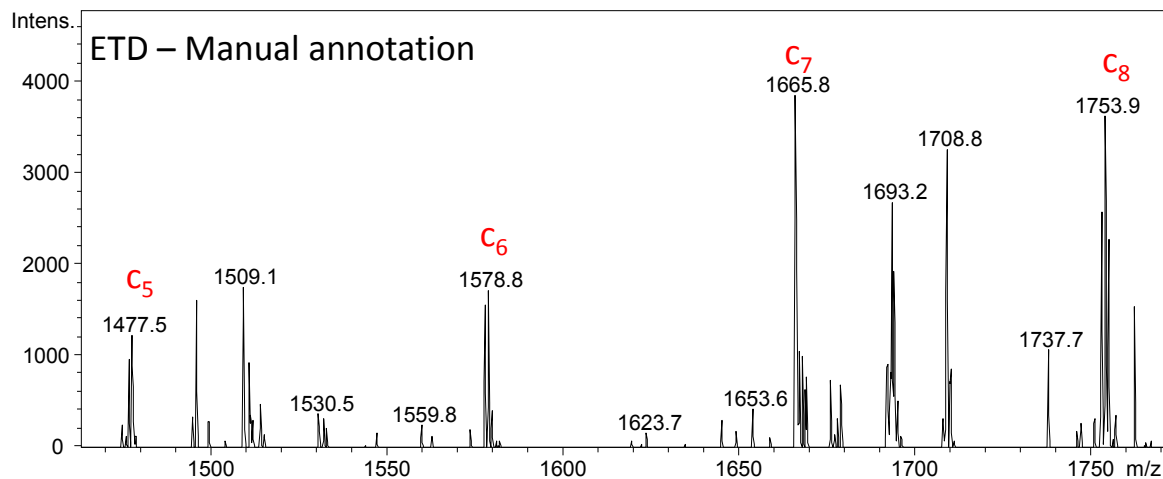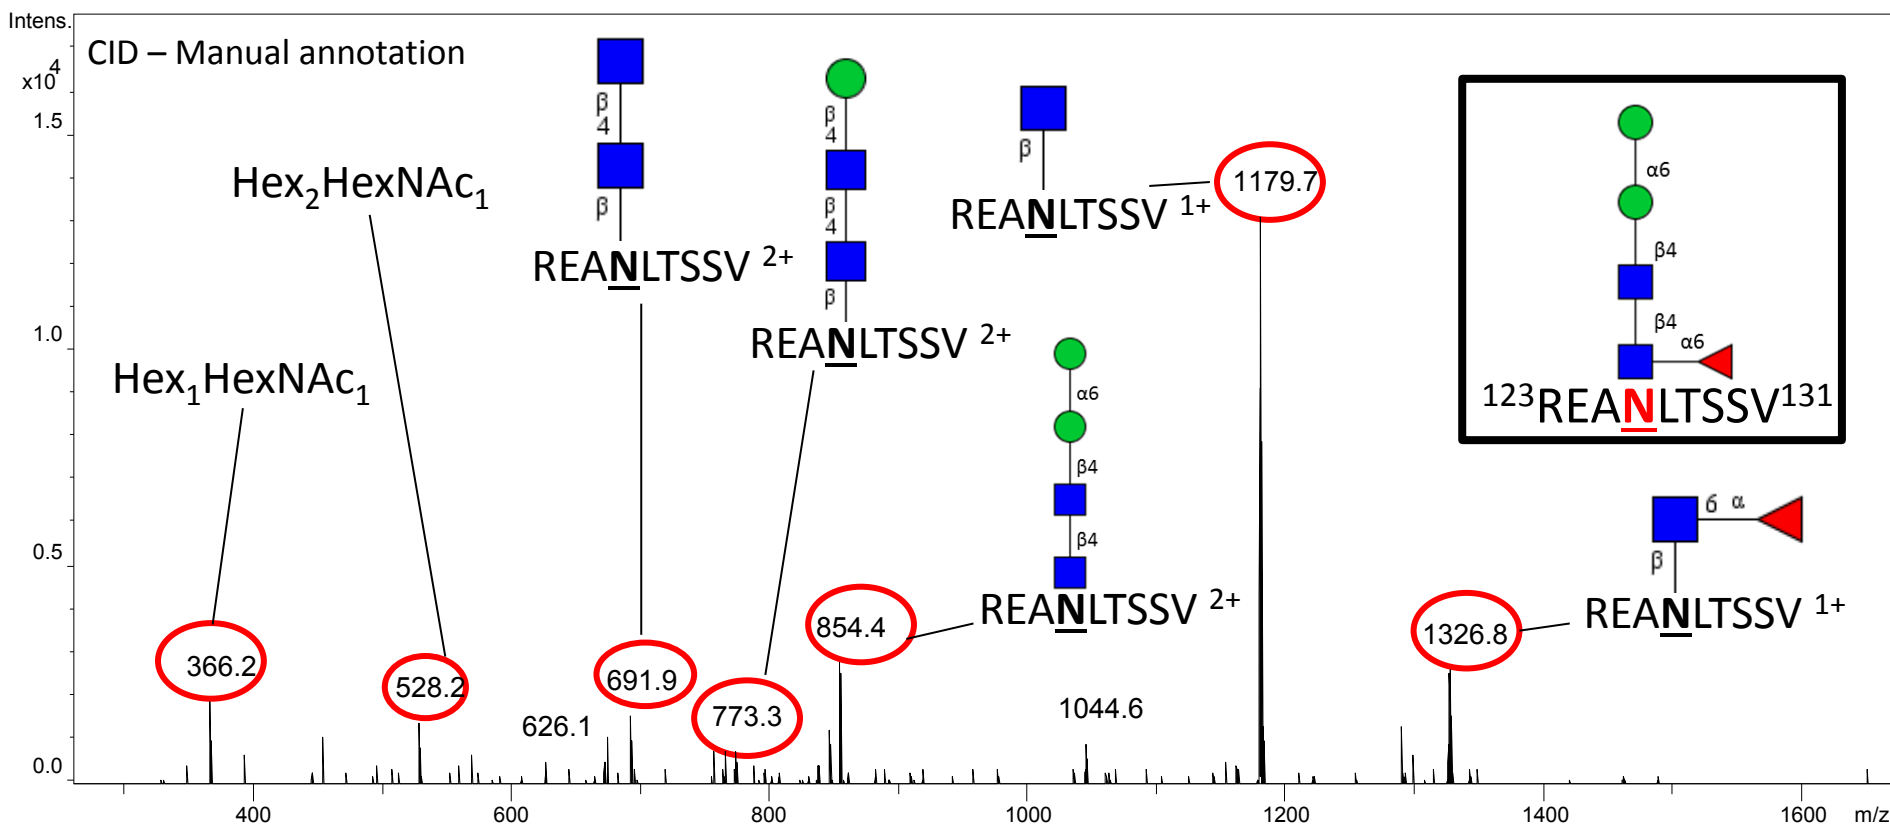

## Retention time: 32.6 min

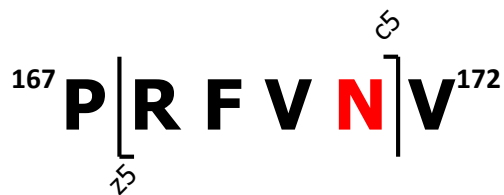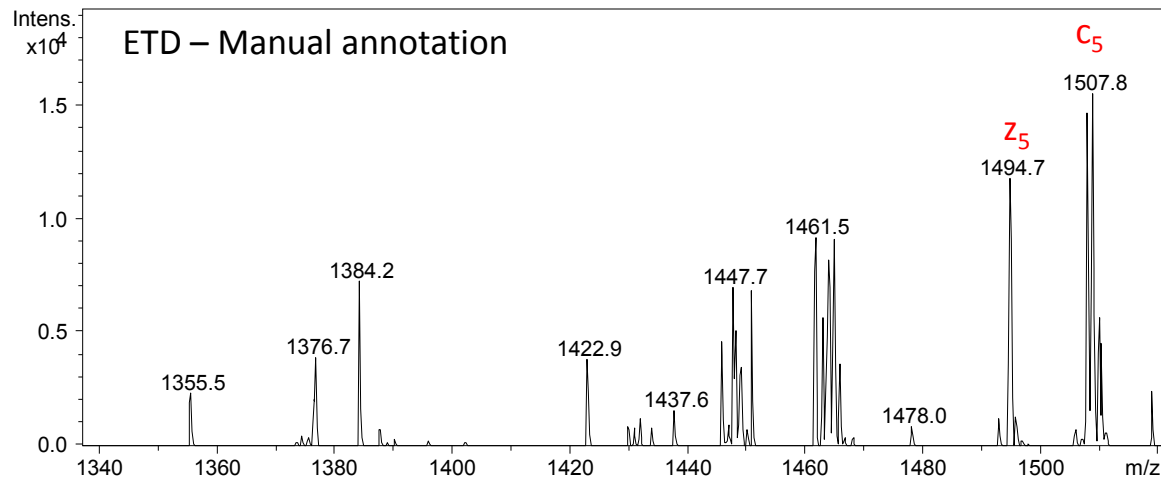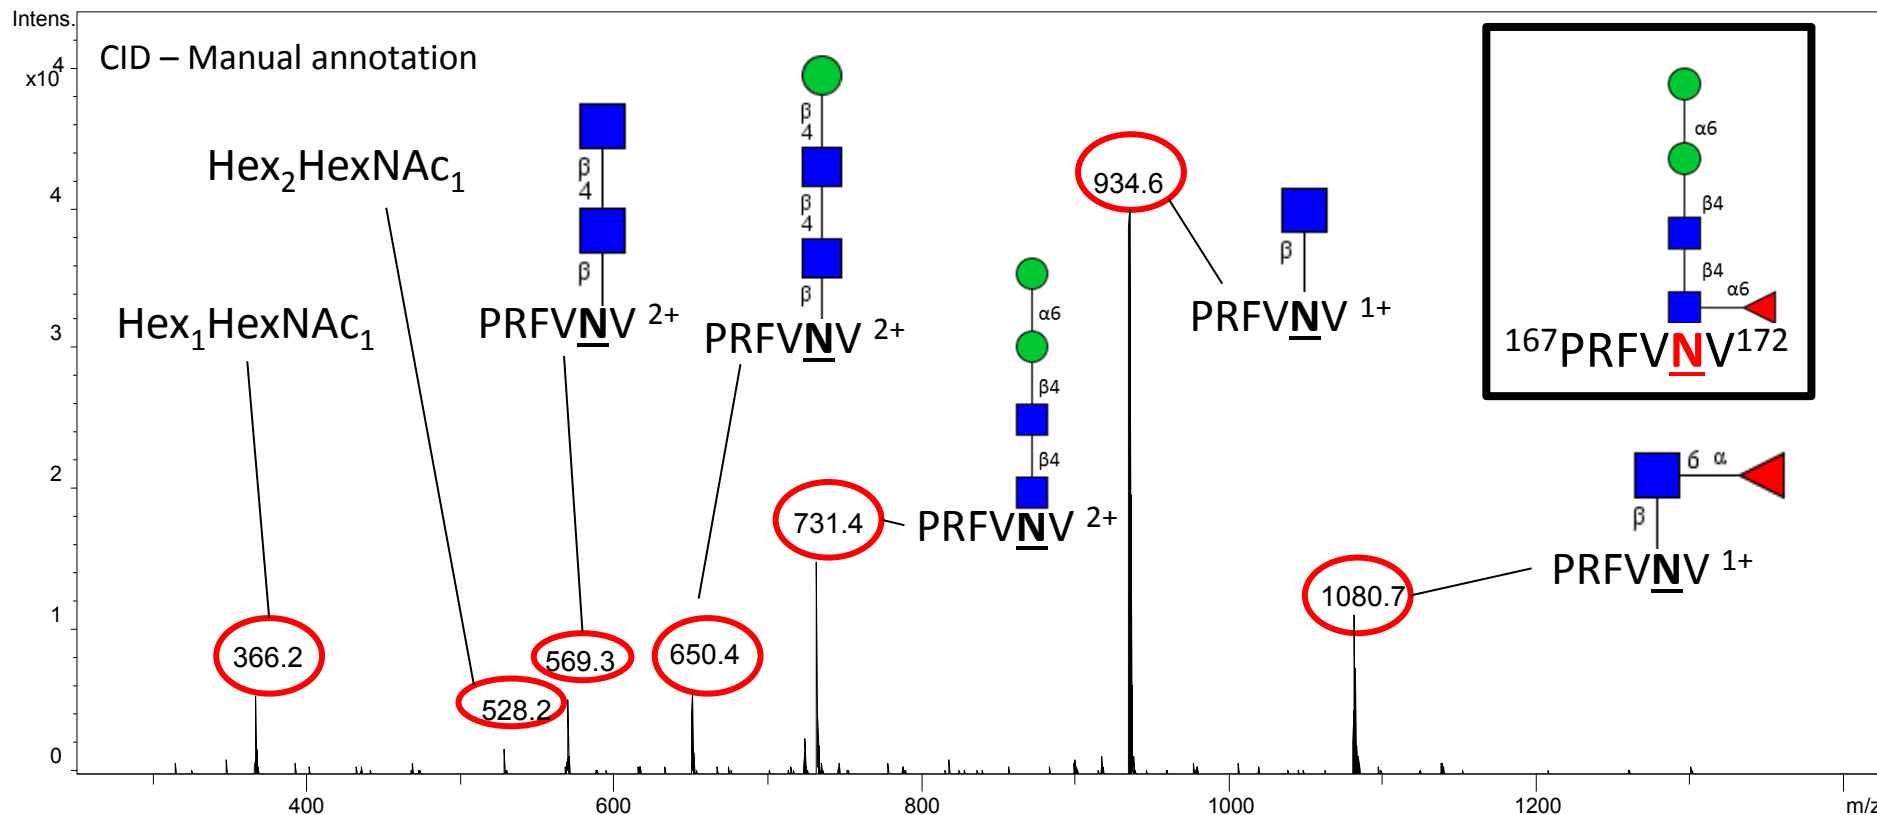

# Human neutrophil elastase – P08246

QELNVTVV (Asn173)

Obs.  $m/z$  889.4 (2+)

Obs.  $[M+H]^+ = 1777.8$  Da

Glycan: 876.8 Da (Fuc<sub>1</sub>Hex<sub>2</sub>HexNAc<sub>2</sub>)

Calc.  $[M+H]^+ = 1777.8$  Da

Retention time: 40.4 min

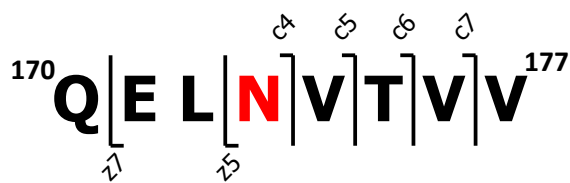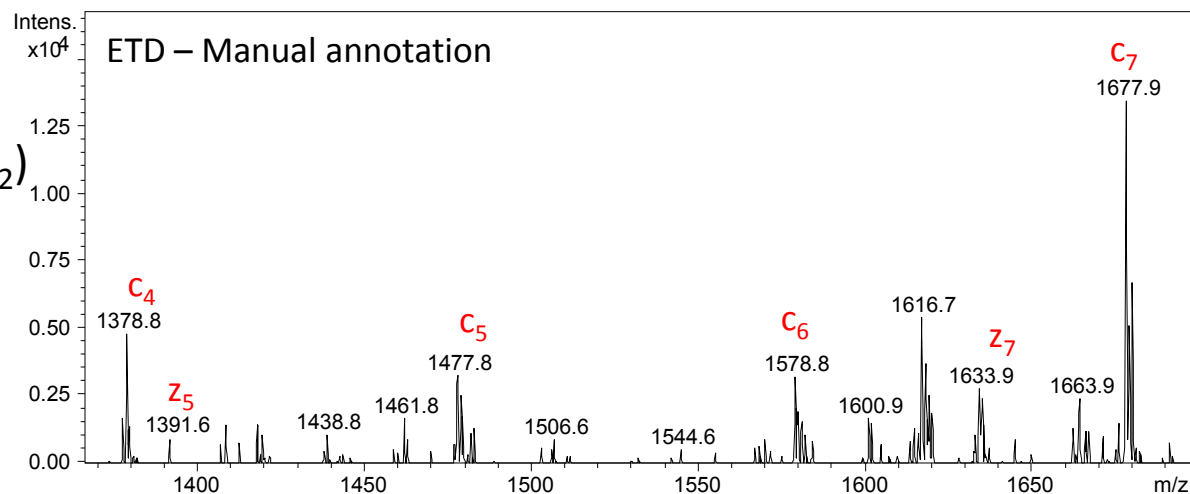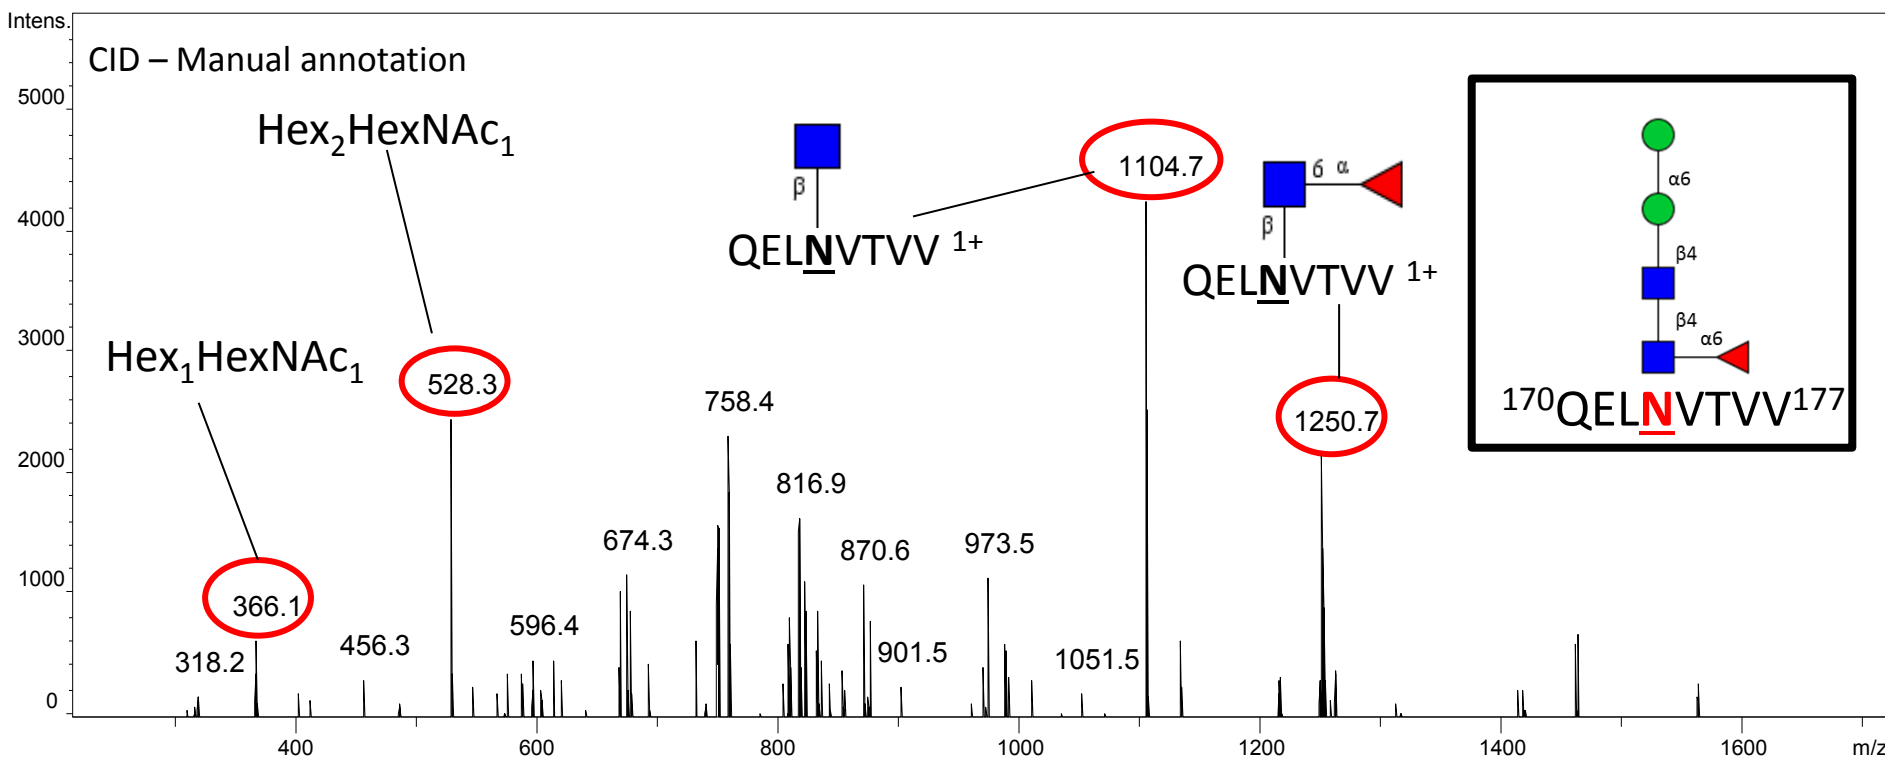

# Human neutrophil elastase – P08246

QLNGSATI (Asn124)

Obs.  $m/z$  840.0 (2+)

Obs.  $[M+H]^+ = 1679.0$  Da

Glycan: 876.8 Da (Fuc<sub>1</sub>Hex<sub>2</sub>HexNAc<sub>2</sub>)

Calc.  $[M+H]^+ = 1679.7$  Da

Retention time: 28.0 min

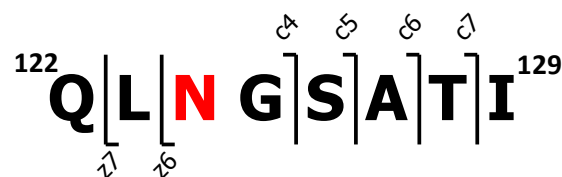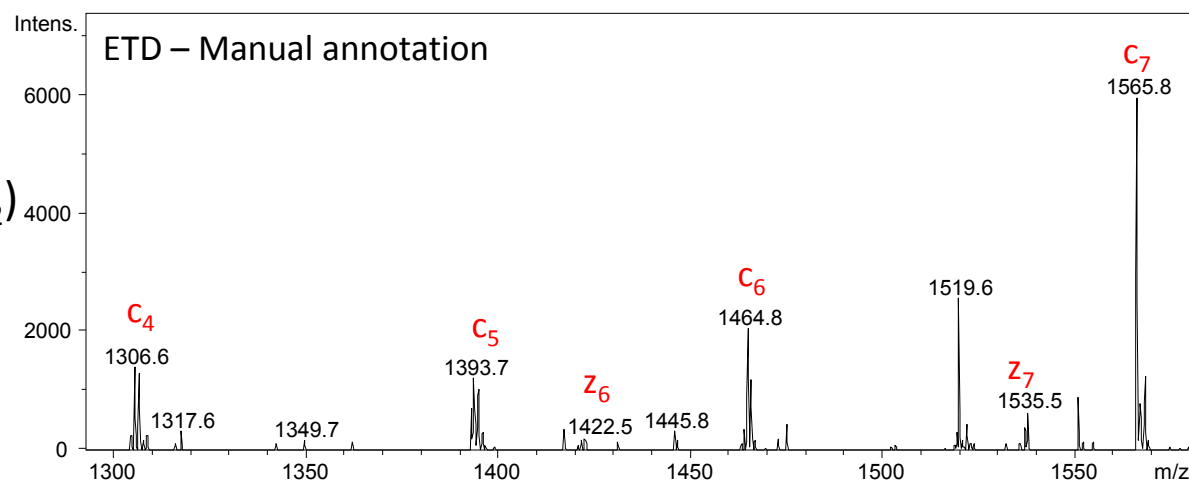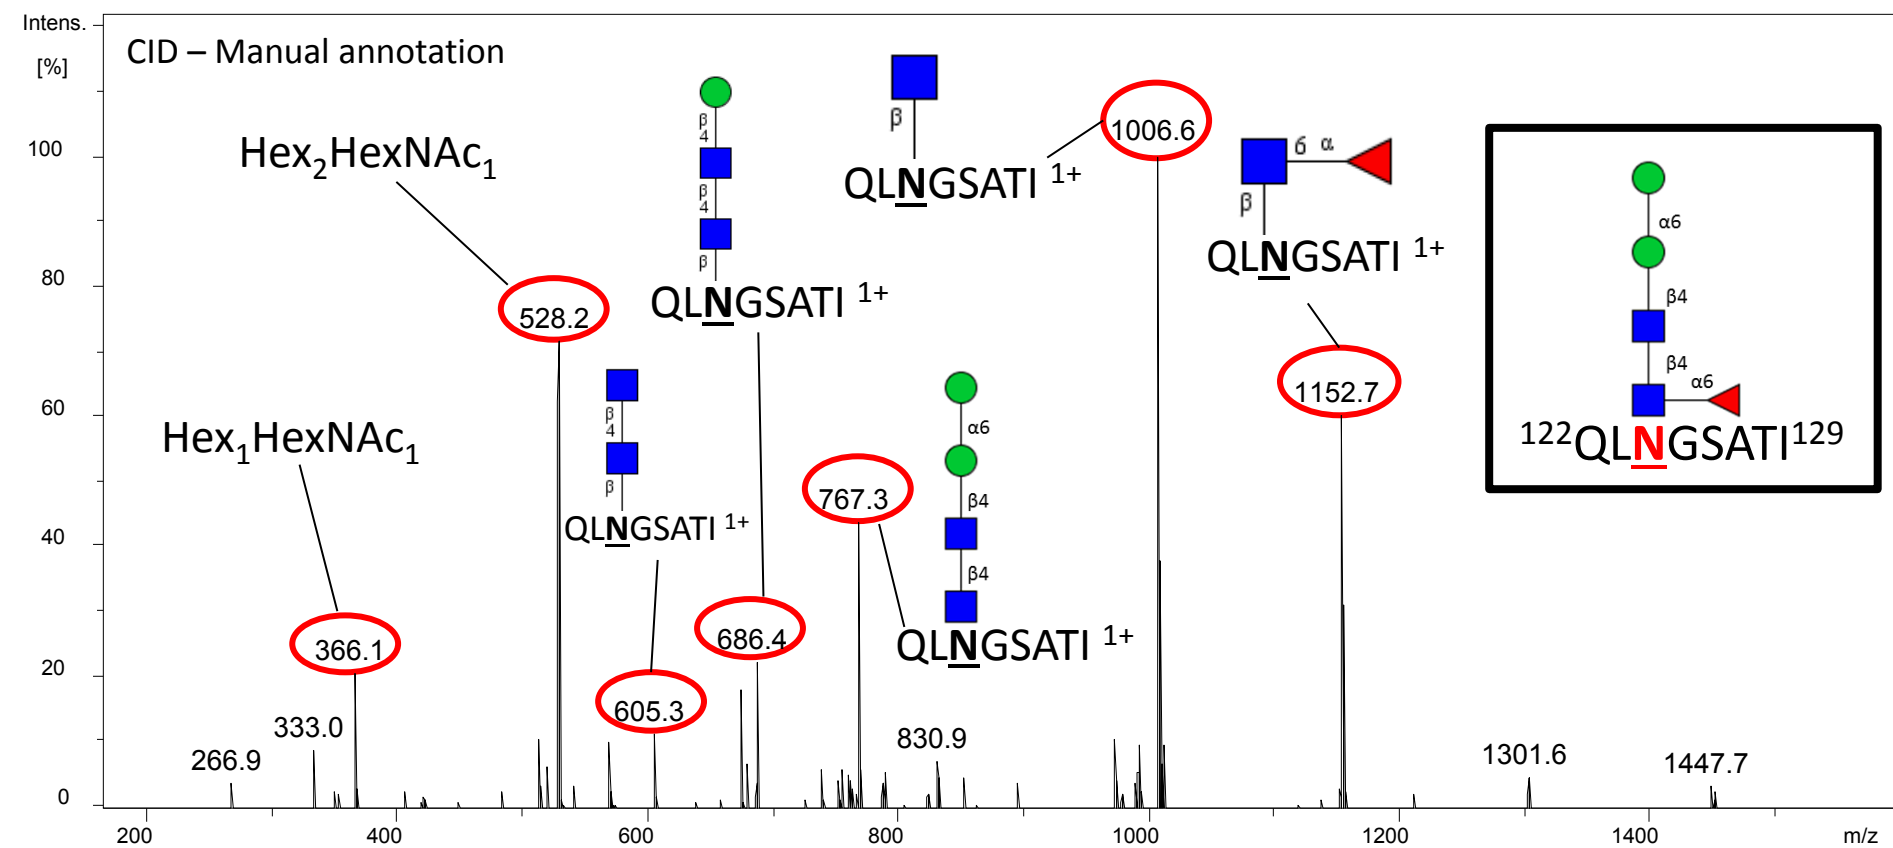

**Supplementary Figure S5.** Presence of oxidised (top) and absence of non-oxidised (bottom) Met152 on a chymotryptic peptide of nCG as evaluated using RP-LC-ESI-ETD-MS/MS.

\* Monoisotopic precursor.

<sup>148</sup>GRVSM<sup>ox</sup>RRGTDTL<sup>159</sup>

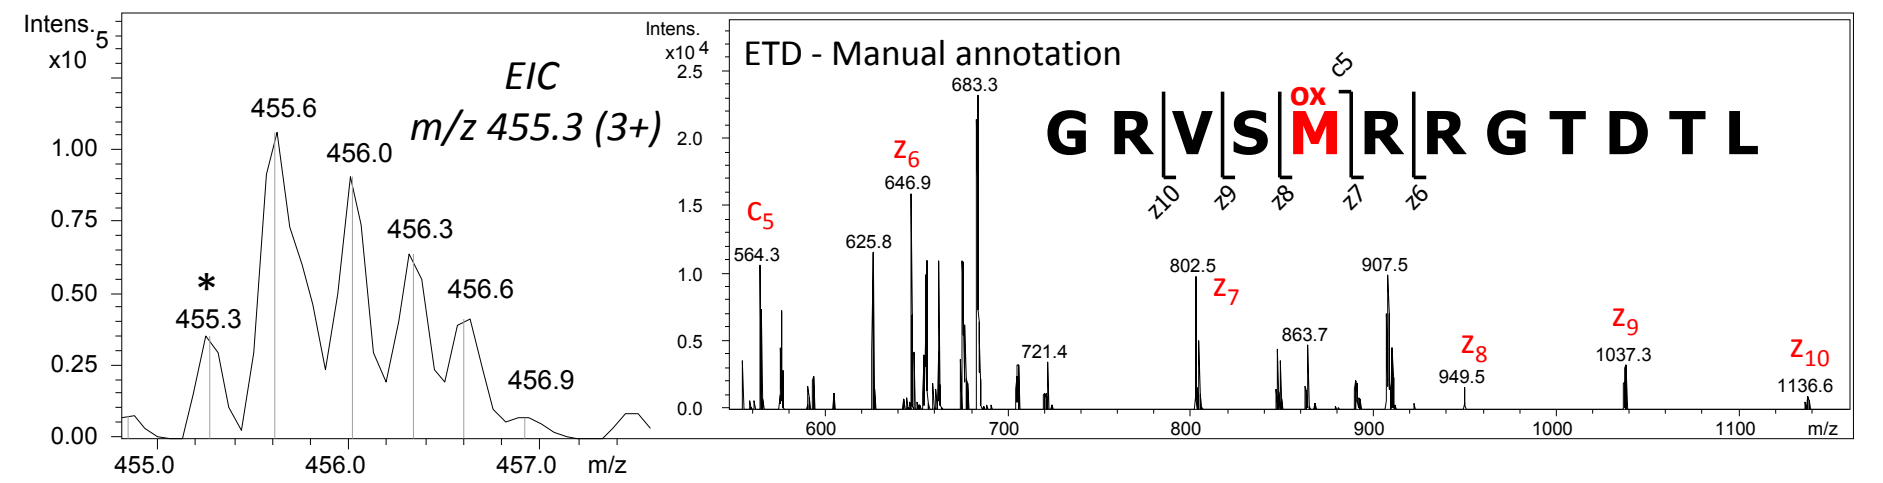

<sup>148</sup>GRVSMRRGTDTL<sup>159</sup>

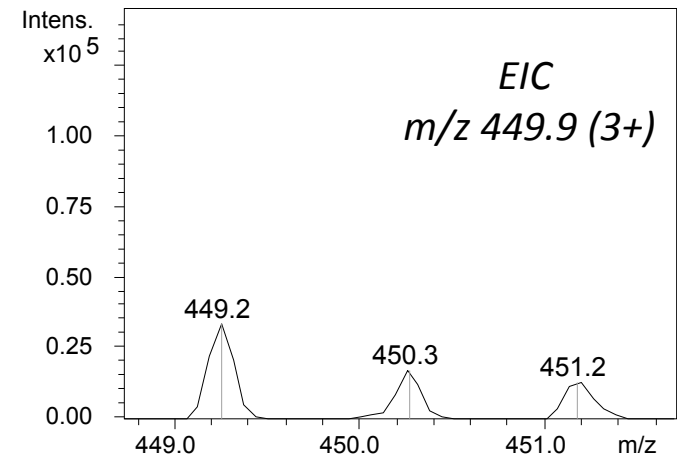



**Supplementary Figure S6.** Comparison of high and low fragmentor potential when profiling intact nCG using high resolution QTOF-ESI-MS. The masses after deconvolution of nCG Arg243 and Ser244 C-terminal variants are presented in black and red, respectively. -ox denotes Met152 oxidation. § denotes water loss. \* denotes adduct formation.

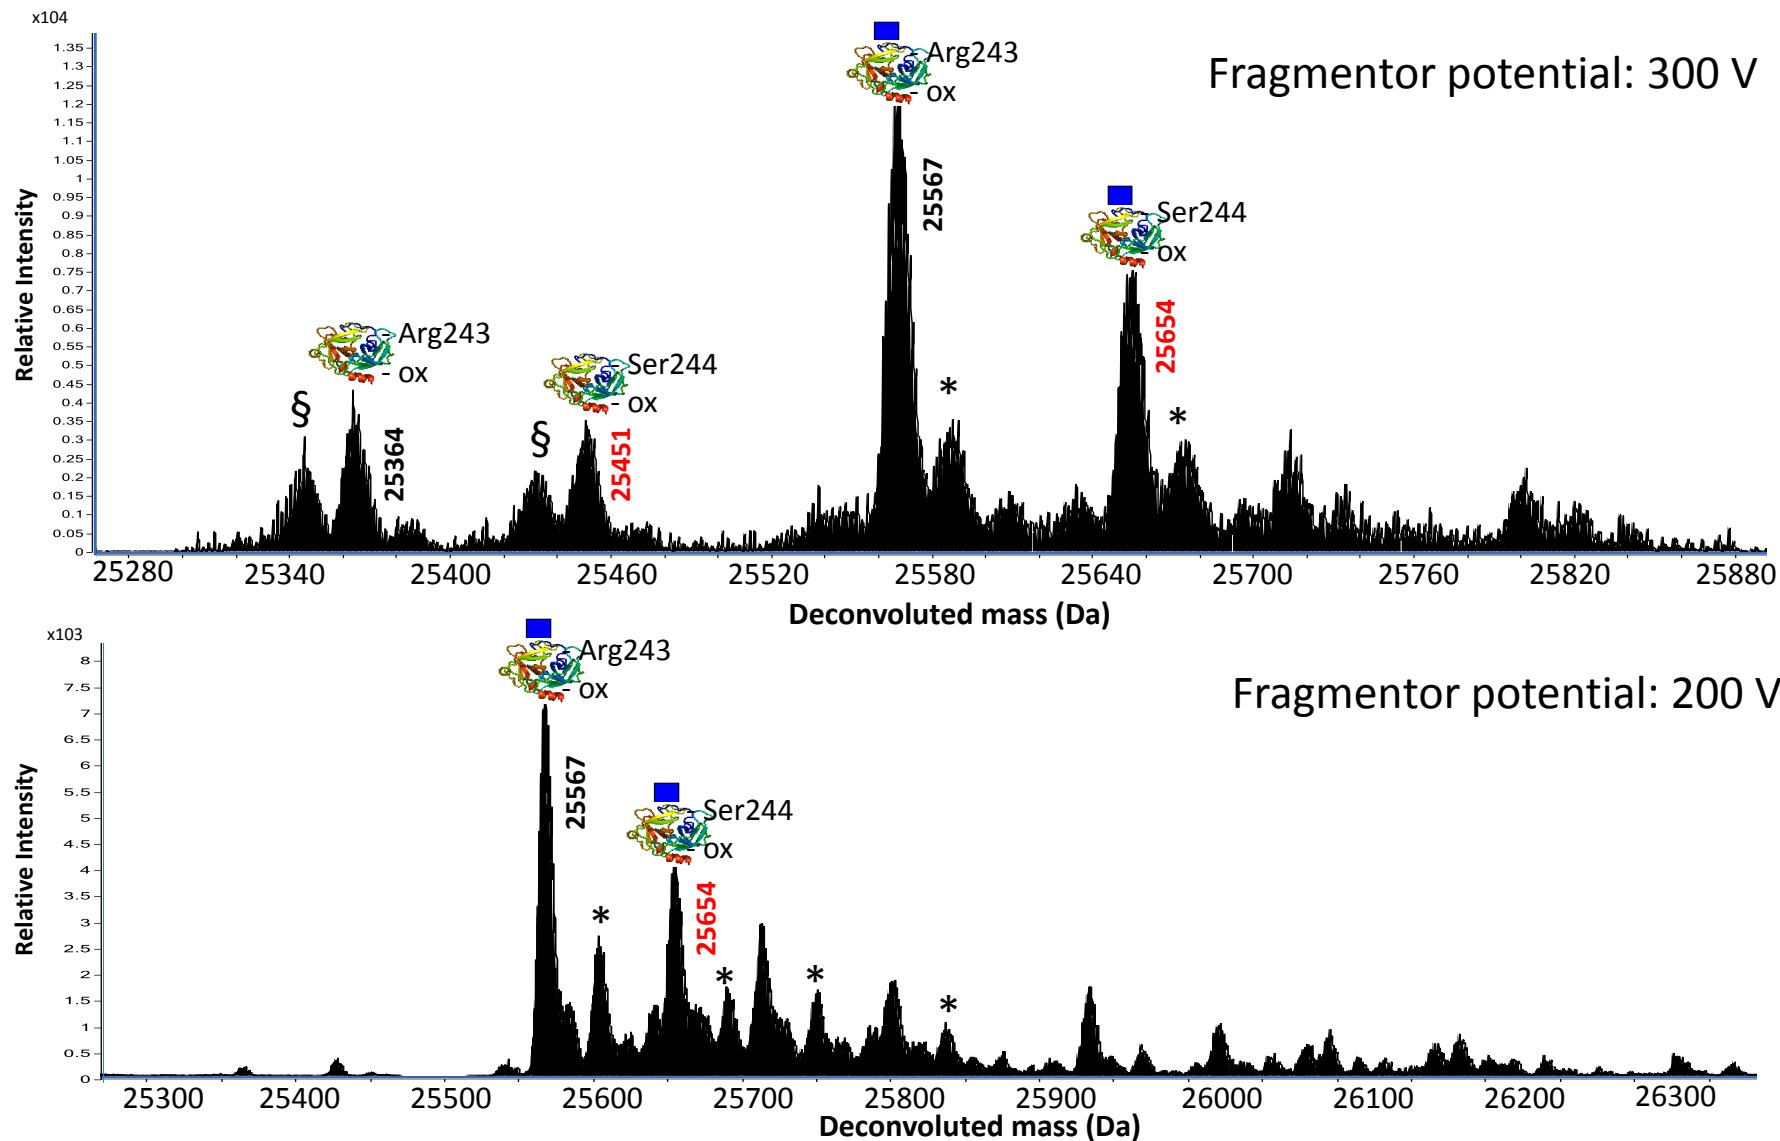



**Supplementary Figure S8.** 3D modelling of the trimannosyl-chitobiose core monoantennary core fucosylated  $\alpha$ 2,6-monosialylated *N*-glycan on Asn71 of nCG. The height of the *N*-glycan from the asparagine base ( $\sim 27$  Å) is longer than the distance to the active site ( $\sim 19$  Å).

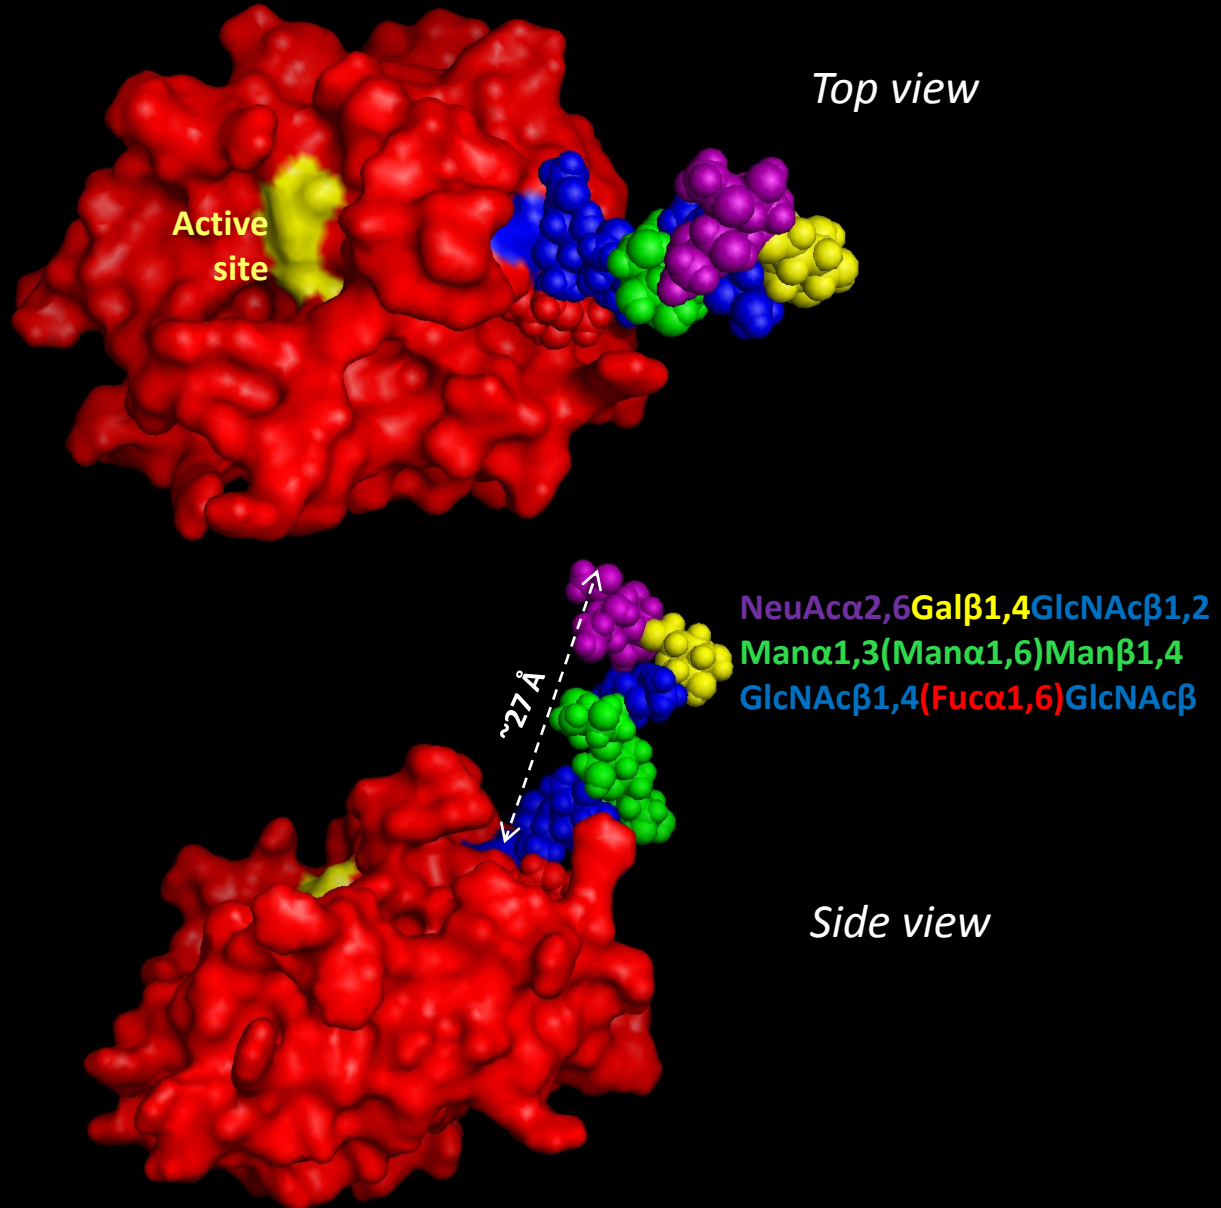

Supplement: s1 [file s1]
